# Supplementary material for: Cu-catalyzed carboxylation of organoboronic acid pinacol esters with CO2
Source: Royal Society of Chemistry journal article supplement (doi:10.1039/d3ob00938f), 2023-01-01
Supplement: d3ob00938f1.pdf [file d3ob00938f1.pdf]

## Electronic Supplementary Information

### Cu-catalyzed carboxylation of organoboronic acid pinacol esters with CO<sub>2</sub>

Chihiro Maeda,\* Takumi Cho, Ren Kumemoto, and Tadashi Ema\*

*Division of Applied Chemistry, Graduate School of Natural Science and Technology, Okayama University,  
Tsushima, Okayama 700-8530, Japan.*

*E-mail: cmaeda@okayama-u.ac.jp; ema@cc.okayama-u.ac.jp*

#### Table of Contents

|                                                            |     |
|------------------------------------------------------------|-----|
| [A] Instrumentation and Materials .....                    | S2  |
| [B] Experimental Procedures and Compound Data.....         | S2  |
| [C] References .....                                       | S8  |
| [D] Comparison with the Reported Reaction Conditions ..... | S9  |
| [E] NMR Spectra.....                                       | S10 |

## [A] Instrumentation and Materials

$^1\text{H}$  and  $^{13}\text{C}$  NMR spectra were taken on a JEOL ECS400 or ECZ600 spectrometer, and chemical shifts are reported as the delta scale in ppm using an internal reference ( $\delta = 7.26$  for  $^1\text{H}$  NMR, 77.16 for  $^{13}\text{C}$  NMR, for  $\text{CDCl}_3$ ,  $\delta = 2.05$  for  $^1\text{H}$  NMR, 29.84 for  $^{13}\text{C}$  NMR, for acetone- $d_6$ , and  $\delta = 2.50$  for  $^1\text{H}$  NMR, 39.52 for  $^{13}\text{C}$  NMR, for DMSO- $d_6$ ). 1-(4,4,5,5-Tetramethyl-1,3,2-dioxaborolan-2-yl)-9*H*-carbazole (**1j**),<sup>1</sup> 1,4-naphthalenediboronic acid bis(pinacol) ester (**1n**),<sup>2</sup> 2,7-pyrenediboronic acid bis(pinacol) ester (**1n**),<sup>3</sup> (*E*)-styrylboronic acid pinacol ester (**3a**),<sup>4</sup> (*E*)-(4-methoxystyryl)boronic acid pinacol ester (**3b**),<sup>4</sup> (phenylethynyl)boronic acid pinacol ester (**3g**),<sup>5</sup> 1,4-bis((*E*)-2-(4,4,5,5-tetramethyl-1,3,2-dioxaborolan-2-yl)vinyl)benzene (**3h**),<sup>4</sup> 1,3-bis((*E*)-2-(4,4,5,5-tetramethyl-1,3,2-dioxaborolan-2-yl)vinyl)benzene (**3i**),<sup>4</sup> 1,3,5-tris((*E*)-2-(4,4,5,5-tetramethyl-1,3,2-dioxaborolan-2-yl)vinyl)benzene (**3j**),<sup>4</sup> 3,4-methylenedioxyphenylboronic acid pinacol ester,<sup>6</sup> and biphenyl-4-ylmethylboronic acid pinacol ester<sup>7</sup> were prepared according to literature procedures.

## [B] Experimental Procedures and Compound Data

**General procedure for the copper-catalyzed carboxylation of organoboronic acid pinacol esters with  $\text{CO}_2$ .** A 30 mL stainless autoclave containing organoboronic acid pinacol ester (0.5 mmol) and (IPr)CuCl (12.2 mg, 0.025 mmol, 5 mol%) was dried in vacuo and placed in a glove box (purge type) under  $\text{N}_2$  atmosphere.  $t\text{BuOK}$  (2.81 mg, 0.025 mmol, 5 mol%), CsF (152 mg, 1.00 mmol, dried at 80 °C for 12 h in vacuo and cooled to room temperature in advance) and dry 1,4-dioxane (1.0 mL) were added, and the autoclave was closed. The sealed autoclave was taken out from the glovebox and pressurized with 2.0 MPa of  $\text{CO}_2$ . The mixture was stirred at 150 °C for 24 h, and then the autoclave was cooled to room temperature, and the remaining  $\text{CO}_2$  was vented slowly. The reaction mixture was acidified with 1 M HCl (aq), and the aqueous layer was extracted with EtOAc twice. The combined organic layer was washed with brine, dried over  $\text{Na}_2\text{SO}_4$ , and evaporated under reduced pressure. Purification by silica gel column chromatography gave the corresponding carboxylic acid.

**General procedure for the copper-catalyzed double carboxylation of organodiboronic acid bis(pinacol) esters with  $\text{CO}_2$ .** A 30 mL stainless autoclave containing organodiboronic acid bis(pinacol) ester (0.5 mmol) and (IPr)CuCl (24.4 mg, 0.050 mmol, 10 mol%) was dried in vacuo and placed in a glove box (purge type) under  $\text{N}_2$  atmosphere.  $t\text{BuOK}$  (5.61 mg, 0.050 mmol, 10 mol%), CsF (304 mg, 2.00 mmol, dried at 80 °C for 12 h in vacuo and cooled to room temperature in advance) and dry 1,4-dioxane (2.0 mL) were added, and the autoclave was closed. The sealed autoclave was taken out from the glovebox and pressurized with 2.0 MPa of  $\text{CO}_2$ . The mixture was stirred at 160 °C or 170 °C for 24 h, and then the autoclave was cooled to room temperature, and the remaining  $\text{CO}_2$  was vented slowly. 10% NaOH (aq) was added to the reaction mixture, and the aqueous layer was washed with  $\text{Et}_2\text{O}$  once. The aqueous layer was acidified with 5%  $\text{H}_2\text{SO}_4$  (aq). For **2l**, **2o**, and **4h–j**, a powder precipitated was collected and washed with water and  $\text{CHCl}_3$  to give the dicarboxylic acid. For **2o**, the crude product was dissolved in DMSO (10 mL), and MeI (1.2 mL, 2.0 mmol) and  $\text{K}_2\text{CO}_3$  (276 mg, 2.00 mmol) were added. The mixture was stirred at 50 °C for 12 h. Water was added, and organic products were extracted with  $\text{CHCl}_3$ . Purification by silica gel column chromatography ( $\text{CHCl}_3$ ) gave methyl ester **2o'**. For **2m**, **2n**, **2p**, and **2q**, the product was extracted with  $\text{Et}_2\text{O}$  twice, and the combined organic layer was washed with brine, dried over  $\text{Na}_2\text{SO}_4$ , and evaporated under reduced pressure. Suction filtration of the precipitate gave the dicarboxylic acid.

**Table S1** Initial screening of the reaction conditions of the Cu-catalyzed carboxylation of phenylboronic acid pinacol ester (**1a**) with CO<sub>2</sub>.<sup>a</sup> A photograph of the 30 mL stainless autoclave is shown.

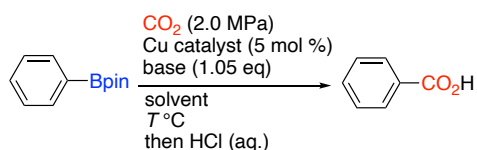

| Entry           | Cu-catalyst      | Solvent     | Base                                  | <i>T</i> (°C) | Yield <sup>b</sup> (%) |
|-----------------|------------------|-------------|---------------------------------------|---------------|------------------------|
| 1 <sup>c</sup>  | IPrCuCl          | toluene     | KO <sup>t</sup> Bu                    | 110           | 0                      |
| 2               | IPrCuCl          | toluene     | KO <sup>t</sup> Bu                    | 150           | 13                     |
| 3               | IPrCuCl          | THF         | KO <sup>t</sup> Bu                    | 150           | 26                     |
| 4               | IPrCuCl          | 1,4-dioxane | KO <sup>t</sup> Bu                    | 150           | 48                     |
| 5               | IPrCuCl          | 1,4-dioxane | KO <sup>t</sup> Bu                    | 130           | 21                     |
| 6               | IPrCuCl          | 1,4-dioxane | KO <sup>t</sup> Bu                    | 170           | 53                     |
| 7               | IMesCuCl         | 1,4-dioxane | KO <sup>t</sup> Bu                    | 150           | 5                      |
| 8 <sup>d</sup>  | CuCl + Xantphos  | 1,4-dioxane | KO <sup>t</sup> Bu                    | 150           | 2                      |
| 9 <sup>d</sup>  | CuCl + TMEDA     | 1,4-dioxane | KO <sup>t</sup> Bu                    | 150           | 0                      |
| 10 <sup>d</sup> | CuCl + 1,10-phen | 1,4-dioxane | KO <sup>t</sup> Bu                    | 150           | 16                     |
| 11              | IPrCuCl          | 1,4-dioxane | NaO <sup>t</sup> Bu                   | 150           | trace                  |
| 12              | IPrCuCl          | 1,4-dioxane | Cs <sub>2</sub> CO <sub>3</sub>       | 150           | 28                     |
| 13              | IPrCuCl          | 1,4-dioxane | <sup>i</sup> Pr <sub>2</sub> NEt      | 150           | 0                      |
| 14              | IPrCuCl          | 1,4-dioxane | KO <sup>t</sup> Bu + CsF <sup>e</sup> | 150           | 36                     |
| 15              | IPrCuCl          | 1,4-dioxane | CsF <sup>e</sup>                      | 150           | 98                     |

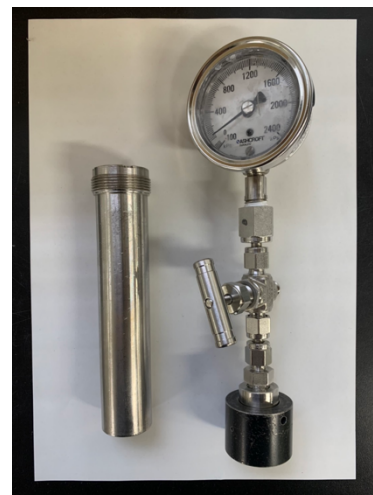

<sup>a</sup> Reaction conditions: **1a** (0.5 mmol), Cu-catalyst (5 mol%), base (1.05 equiv), solvent (1.0 mL), CO<sub>2</sub> (2.0 MPa), 110–170 °C, 24 h, in a 30 mL stainless autoclave. <sup>b</sup> Yields were determined by <sup>1</sup>H NMR spectroscopy using 2-methoxynaphthalene as an internal standard. <sup>c</sup> 0.1 MPa CO<sub>2</sub> (balloon). <sup>d</sup> 5 mol% of ligand was used. <sup>e</sup> 2 equiv of CsF was used.

#### benzoic acid (**2a**)<sup>8</sup>

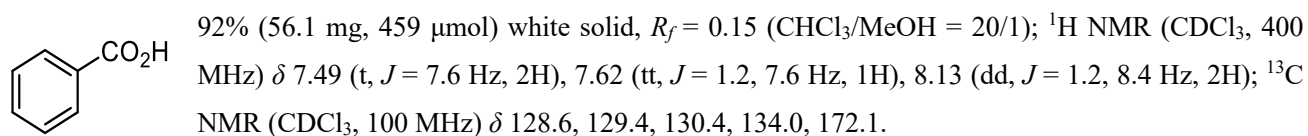

#### *p*-toluic acid (**2b**)<sup>9</sup>

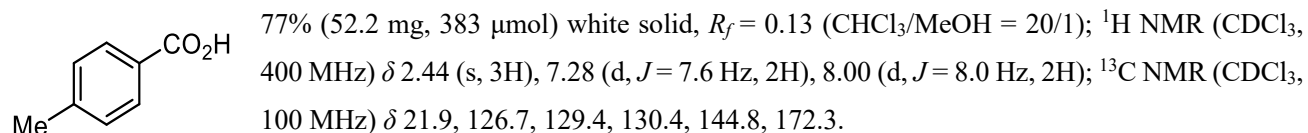

#### *p*-anisic acid (**2c**)<sup>10</sup>

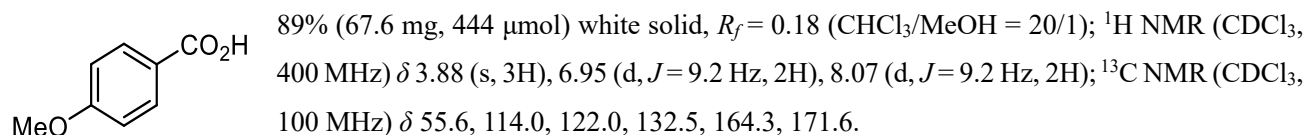

#### 4-methoxycarbonylbenzoic acid (2d)<sup>11</sup>

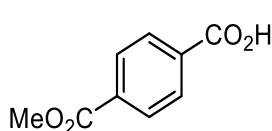

94% (84.3 mg, 468  $\mu\text{mol}$ ) white solid,  $R_f = 0.10$  ( $\text{CHCl}_3/\text{MeOH} = 20/1$ ), and  $R_f = 0.13$  ( $\text{CHCl}_3/\text{MeOH} = 9/1$ );  $^1\text{H NMR}$  ( $\text{DMSO-}d_6$ , 400 MHz)  $\delta$  3.88 (s, 3H), 8.06 (s, 4H), 13.37 (s, 1H);  $^{13}\text{C NMR}$  ( $\text{DMSO-}d_6$ , 100 MHz)  $\delta$  52.5, 129.4, 129.7, 133.2, 135.0, 165.6, 166.7.

#### 4-trifluoromethylbenzoic acid (2e)<sup>10</sup>

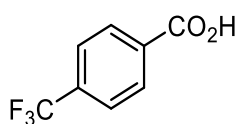

61% (58.3 mg, 307  $\mu\text{mol}$ ) white solid,  $R_f = 0.07$  ( $\text{CHCl}_3/\text{MeOH} = 20/1$ );  $^1\text{H NMR}$  ( $\text{DMSO-}d_6$ , 400 MHz)  $\delta$  7.88 (d,  $J = 8.0$  Hz, 2H), 8.13 (d,  $J = 8.0$  Hz, 2H), 13.49 (s, 1H);  $^{13}\text{C NMR}$  ( $\text{DMSO-}d_6$ , 100 MHz)  $\delta$  123.8 (q,  $J = 271.5$  Hz), 125.7 (q,  $J = 2.9$  Hz), 130.3, 132.5 (q,  $J = 31.8$  Hz), 135.1, 165.9.

#### *m*-anisic acid (2f)<sup>10</sup>

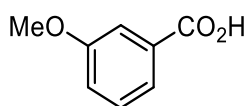

76% (58.1 mg, 382  $\mu\text{mol}$ ) white solid,  $R_f = 0.13$  ( $\text{CHCl}_3/\text{MeOH} = 20/1$ );  $^1\text{H NMR}$  ( $\text{CDCl}_3$ , 400 MHz)  $\delta$  3.87 (s, 3H), 7.16 (ddd,  $J = 1.2, 2.8, 8.4$  Hz, 1H), 7.39 (t,  $J = 8.4$  Hz, 1H), 7.62–7.63 (m, 1H), 7.72 (d,  $J = 7.6$  Hz, 1H);  $^{13}\text{C NMR}$  ( $\text{CDCl}_3$ , 100 MHz)  $\delta$  55.6, 114.5, 120.6, 122.8, 129.7, 130.8, 159.7, 172.3.

#### *o*-anisic acid (2g)<sup>10</sup>

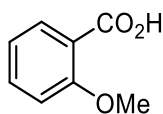

33% (25.0 mg, 164  $\mu\text{mol}$ ) white solid,  $R_f = 0.13$  ( $\text{CHCl}_3/\text{MeOH} = 20/1$ );  $^1\text{H NMR}$  ( $\text{CDCl}_3$ , 400 MHz)  $\delta$  4.09 (s, 3H), 7.07 (d,  $J = 8.0$  Hz, 1H), 7.16 (t,  $J = 7.2$  Hz, 1H), 7.59 (dt,  $J = 1.6, 7.2$  Hz, 1H), 8.20 (dd,  $J = 2.0, 8.0$  Hz, 1H), 10.74 (s, 1H);  $^{13}\text{C NMR}$  ( $\text{CDCl}_3$ , 100 MHz)  $\delta$  56.8, 111.8, 117.7, 122.3, 133.9, 135.2, 158.2, 165.7.

#### 1-naphthoic acid (2h)<sup>10</sup>

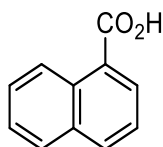

68% (58.4 mg, 339  $\mu\text{mol}$ ) white solid,  $R_f = 0.13$  ( $\text{CHCl}_3/\text{MeOH} = 20/1$ ), and  $R_f = 0.05$  (hexane/EtOAc = 5/1);  $^1\text{H NMR}$  ( $\text{DMSO-}d_6$ , 400 MHz)  $\delta$  7.57–7.67 (m, 3H), 8.02 (d,  $J = 7.2$  Hz, 1H), 8.14–8.17 (m, 2H), 8.86 (d,  $J = 8.8$  Hz, 1H), 13.14 (s, 1H);  $^{13}\text{C NMR}$  ( $\text{DMSO-}d_6$ , 100 MHz)  $\delta$  124.9, 125.5, 126.2, 127.6, 127.7, 128.6, 129.9, 130.7, 133.0, 133.5, 168.7.

#### thiophene-2-carboxylic acid (2i)<sup>10</sup>

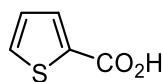

53% (34.1 mg, 266  $\mu\text{mol}$ ) white solid,  $R_f = 0.05$  ( $\text{CHCl}_3/\text{MeOH} = 20/1$ );  $^1\text{H NMR}$  ( $\text{CDCl}_3$ , 400 MHz)  $\delta$  7.15 (dd,  $J = 3.8, 4.4$  Hz, 1H), 7.65 (dd,  $J = 1.2, 5.2$  Hz, 1H), 7.90 (dd,  $J = 1.2, 3.6$  Hz, 1H);  $^{13}\text{C NMR}$  ( $\text{CDCl}_3$ , 100 MHz)  $\delta$  128.3, 133.1, 134.2, 135.3, 168.0.

#### carbazole-1-carboxylic acid (2j)<sup>12</sup>

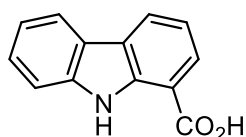

51% (53.8 mg, 255  $\mu\text{mol}$ ) white solid,  $R_f = 0.30$  ( $\text{CHCl}_3/\text{MeOH} = 9/1$ );  $^1\text{H NMR}$  ( $\text{DMSO-}d_6$ , 400 MHz)  $\delta$  7.18–7.27 (m, 2H), 7.42 (t,  $J = 6.8$  Hz, 1H), 7.74 (d,  $J = 8.8$  Hz, 1H), 8.00 (d,  $J = 7.2$  Hz, 1H), 8.16 (d,  $J = 8.0$  Hz, 1H), 8.39 (d,  $J = 7.2$  Hz, 1H), 11.32 (s, 1H), 13.17 (s, 1H);  $^{13}\text{C NMR}$  ( $\text{DMSO-}d_6$ , 100 MHz)  $\delta$  112.3, 112.8, 118.0, 119.3, 120.2, 121.7, 124.2, 125.2, 126.1, 127.5, 139.1, 140.3, 168.0.

**carbazole-3-carboxylic acid (2k)**<sup>13</sup>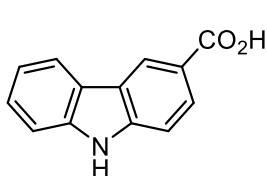

45%, (47.8 mg, 226  $\mu\text{mol}$ ) white solid,  $R_f = 0.25$  ( $\text{CHCl}_3/\text{MeOH} = 9/1$ );  $^1\text{H NMR}$  ( $\text{DMSO-}d_6$ , 400 MHz)  $\delta$  7.22 (t,  $J = 7.6$  Hz, 1H), 7.44 (t,  $J = 7.2$  Hz, 1H), 7.54 (d,  $J = 9.2$  Hz, 2H), 8.02 (dd,  $J = 1.6, 8.4$  Hz, 1H), 8.24 (d,  $J = 8.0$  Hz, 1H), 8.78 (s, 1H), 11.66 (s, 1H), 12.58 (s, 1H);  $^{13}\text{C NMR}$  ( $\text{DMSO-}d_6$ , 150 MHz)  $\delta$  110.6, 111.4, 119.5, 120.6, 121.0, 122.2, 122.49, 122.50, 126.3, 127.0, 140.3, 142.4, 168.1.

**terephthalic acid (2l)**<sup>11</sup>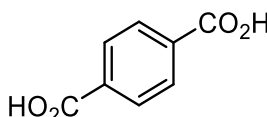

65% (54.1 mg, 326  $\mu\text{mol}$ ) white solid;  $^1\text{H NMR}$  ( $\text{DMSO-}d_6$ , 400 MHz)  $\delta$  8.04 (s, 4H), 13.29 (s, 2H);  $^{13}\text{C NMR}$  ( $\text{DMSO-}d_6$ , 100 MHz)  $\delta$  129.5, 134.5, 166.7.

**isophthalic acid (2m)**<sup>14</sup>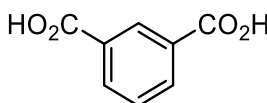

51% (42.7 mg, 257  $\mu\text{mol}$ ) white solid;  $^1\text{H NMR}$  ( $\text{DMSO-}d_6$ , 400 MHz)  $\delta$  7.64 (t,  $J = 8.0$  Hz, 1H), 8.16 (dd,  $J = 2.0, 8.0$  Hz, 2H), 8.48 (s, 1H), 13.25 (s, 2H);  $^{13}\text{C NMR}$  ( $\text{DMSO-}d_6$ , 100 MHz)  $\delta$  129.2, 130.1, 131.3, 133.5, 166.7.

**1,4-naphthalenedicarboxylic acid (2n)**<sup>15</sup>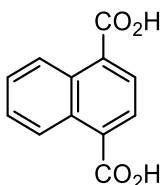

45% (48.7 mg, 225  $\mu\text{mol}$ ) white solid;  $^1\text{H NMR}$  ( $\text{DMSO-}d_6$ , 400 MHz)  $\delta$  7.70 (dd,  $J = 3.6, 6.4$  Hz, 2H), 8.10 (s, 2H), 8.78 (dd,  $J = 3.6, 6.8$  Hz, 2H), 13.51 (s, 2H);  $^{13}\text{C NMR}$  ( $\text{DMSO-}d_6$ , 100 MHz)  $\delta$  125.9, 127.6, 127.9, 130.8, 132.3, 168.5.

**dimethyl 2,7-pyrenedicarboxylate (2o')**<sup>16</sup>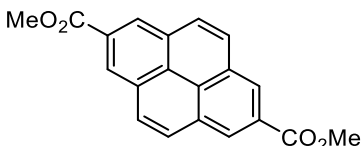

42% (66.6 mg, 209  $\mu\text{mol}$ ) light yellow solid;  $^1\text{H NMR}$  ( $\text{CDCl}_3$ , 600 MHz)  $\delta$  4.09 (s, 6H), 8.13 (s, 4H), 8.82 (s, 4H);  $^{13}\text{C NMR}$  ( $\text{CDCl}_3$ , 100 MHz)  $\delta$  52.6, 126.3, 128.6, 131.7, 167.5.

**2,5-thiophenedicarboxylic acid (2p)**<sup>17</sup>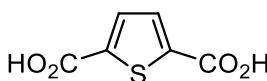

46% (40.0 mg, 232  $\mu\text{mol}$ ) white solid;  $^1\text{H NMR}$  ( $\text{DMSO-}d_6$ , 400 MHz)  $\delta$  7.71 (s, 2H), 13.59 (s, 2H);  $^{13}\text{C NMR}$  ( $\text{DMSO-}d_6$ , 100 MHz)  $\delta$  133.3, 139.8, 162.5.

**2,5-pyrroledicarboxylic acid (2q)**<sup>18</sup>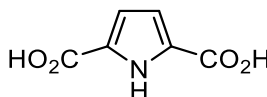

6% (5.0 mg, 32.2  $\mu\text{mol}$ ) gray solid;  $^1\text{H NMR}$  ( $\text{DMSO-}d_6$ , 400 MHz)  $\delta$  6.74 (d,  $J = 1.2$  Hz, 2H), 12.20 (s, 1H), 12.72 (s, 2H);  $^{13}\text{C NMR}$  ( $\text{DMSO-}d_6$ , 100 MHz)  $\delta$  115.1, 127.3, 161.3.

**(E)-cinnamic acid (4a)**<sup>19</sup>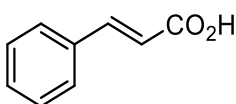

90% (69.5 mg, 469  $\mu\text{mol}$ ) white solid,  $R_f = 0.15$  ( $\text{CHCl}_3/\text{MeOH} = 20/1$ );  $^1\text{H NMR}$  ( $\text{CDCl}_3$ , 400 MHz)  $\delta$  6.47 (d,  $J = 15.6$  Hz, 1H), 7.41–7.42 (m, 3H), 7.55–7.57 (m, 2H), 7.79 (d,  $J = 16.0$  Hz, 1H);  $^{13}\text{C NMR}$  ( $\text{CDCl}_3$ , 100 MHz)  $\delta$  117.4, 128.5, 129.1, 130.9, 134.2, 147.3, 172.6.

**(E)-4-methoxycinnamic acid (4b)**<sup>20</sup>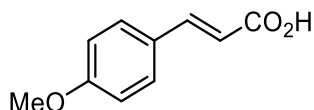

84% (75.9 mg, 426  $\mu$ mol) white solid,  $R_f = 0.07$  ( $\text{CHCl}_3/\text{MeOH} = 30/1$ ), and  $R_f = 0.25$  ( $\text{CHCl}_3/\text{MeOH} = 20/1$ );  $^1\text{H NMR}$  ( $\text{CDCl}_3$ , 400 MHz)  $\delta$  3.85 (s, 3H), 6.32 (d,  $J = 15.6$  Hz, 1H), 6.92 (d,  $J = 9.2$  Hz, 2H), 7.51 (d,  $J = 9.2$  Hz, 2H), 7.74 (d,  $J = 16.0$  Hz, 1H);  $^{13}\text{C NMR}$  ( $\text{DMSO-}d_6$ , 100 MHz)  $\delta$  55.3, 114.6, 126.8, 130.0, 143.8, 161.0, 167.8.

**(E)-4-bromocinnamic acid (4c)**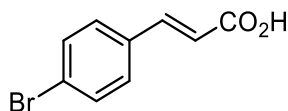

54% (61.7 mg, 272  $\mu$ mol) white solid,  $R_f = 0.05$  ( $\text{CHCl}_3/\text{MeOH} = 20/1$ );  $^1\text{H NMR}$  ( $\text{acetone-}d_6$ , 400 MHz)  $\delta$  6.57 (d,  $J = 16.0$  Hz, 1H), 7.61–7.67 (m, 5H), 10.86 (s, 1H);  $^{13}\text{C NMR}$  ( $\text{acetone-}d_6$ , 100 MHz)  $\delta$  120.2, 124.7, 130.8, 132.9, 134.8, 144.0, 167.4; HRMS (ESI)  $m/z$ :  $[M-H]^-$  Calcd for  $\text{C}_9\text{H}_6\text{O}_2\text{Br}$  224.9557; Found 224.9565.

**(E)-4-trifluoromethylcinnamic acid (4d)**<sup>21</sup>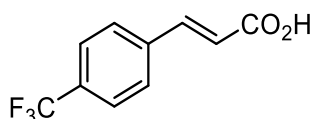

61% (36.1 mg, 167  $\mu$ mol) from **3d** (250  $\mu$ mol) white solid,  $R_f = 0.07$  ( $\text{CHCl}_3/\text{MeOH} = 20/1$ ), and  $R_f = 0.10$  ( $\text{EtOAc}$ );  $^1\text{H NMR}$  ( $\text{DMSO-}d_6$ , 400 MHz)  $\delta$  6.68 (d,  $J = 16.0$  Hz, 1H), 7.66 (d,  $J = 16.0$  Hz, 1H), 7.76 (d,  $J = 8.0$  Hz, 2H), 7.92 (d,  $J = 8.4$  Hz, 2H), 12.62 (s, 1H);  $^{13}\text{C NMR}$  ( $\text{DMSO-}d_6$ , 100 MHz)  $\delta$  122.2, 124.1 (q,  $J = 271.1$  Hz), 125.7 (q,  $J = 3.8$  Hz), 128.9, 129.8 (q,  $J = 31.8$  Hz), 138.3, 142.1, 167.2.

**2-phenylacetic acid (4e)**<sup>19</sup>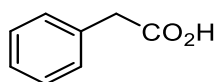

82% (55.8 mg, 410  $\mu$ mol) white solid,  $R_f = 0.20$  ( $\text{CHCl}_3/\text{MeOH} = 9/1$ );  $^1\text{H NMR}$  ( $\text{CDCl}_3$ , 400 MHz)  $\delta$  3.66 (s, 2H), 7.38–7.28 (m, 5H);  $^{13}\text{C NMR}$  ( $\text{CDCl}_3$ , 100 MHz)  $\delta$  127.5, 128.7, 129.5, 133.4, 178.1.

**octanoic acid (4f)**<sup>22</sup>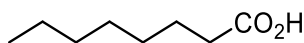

28% (18.5 mg, 128  $\mu$ mol) colorless liquid;  $^1\text{H NMR}$  ( $\text{CDCl}_3$ , 400 MHz)  $\delta$  0.88 (t,  $J = 6.8$  Hz, 3H), 1.16–1.38 (m, 8H), 1.56–1.70 (m, 2H), 2.35 (t,  $J = 7.2$  Hz, 2H);  $^{13}\text{C NMR}$  ( $\text{CDCl}_3$ , 100 MHz)  $\delta$  14.2, 22.7, 24.8, 29.1, 29.2, 31.8, 34.2, 180.3.

**3-phenylpropionic acid (4g)**<sup>19</sup>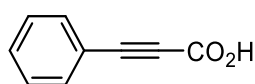

36% (26.7 mg, 183  $\mu$ mol) white solid,  $R_f = 0.05$  ( $\text{CHCl}_3/\text{MeOH} = 20/1$ ), and  $R_f = 0.08$  ( $\text{CHCl}_3/\text{MeOH} = 9/1$ );  $^1\text{H NMR}$  ( $\text{CDCl}_3$ , 400 MHz)  $\delta$  7.40 (t,  $J = 7.6$  Hz, 2H), 7.49 (t,  $J = 7.2$  Hz, 1H), 7.62 (d,  $J = 6.8$  Hz, 2H);  $^{13}\text{C NMR}$  ( $\text{CDCl}_3$ , 100 MHz)  $\delta$  80.4, 89.5, 119.2, 128.8, 131.3, 133.5, 158.5.

**1,4-benzenediacrylic acid (4h)**<sup>23</sup>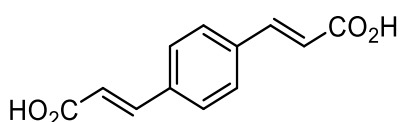

62% (64.1 mg, 294  $\mu$ mol) light brown solid;  $^1\text{H NMR}$  ( $\text{DMSO-}d_6$ , 400 MHz)  $\delta$  6.60 (d,  $J = 16.0$  Hz, 2H), 7.60 (d,  $J = 15.6$  Hz, 2H), 7.73 (s, 4H) 12.46 (s, 2H);  $^{13}\text{C NMR}$  ( $\text{DMSO-}d_6$ , 150 MHz)  $\delta$  120.2, 128.7, 135.9, 143.1, 167.5.

**1,3-benzenediacrylic acid (4i)**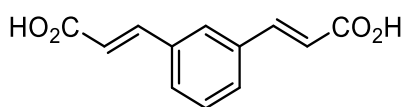

73% (79.7 mg, 365  $\mu$ mol) light yellow solid;  $^1\text{H NMR}$  ( $\text{DMSO-}d_6$ , 400 MHz)  $\delta$  6.67 (d,  $J = 16.0$  Hz, 2H), 7.46 (t,  $J = 8.0$  Hz, 1H), 7.60 (d,  $J = 16.0$  Hz, 2H), 7.72 (dd,  $J = 1.6, 8.0$  Hz, 2H), 8.08 (s, 1H), 12.44 (s, 2H);  $^{13}\text{C NMR}$  ( $\text{DMSO-}d_6$ , 100 MHz)  $\delta$  120.2, 127.7, 129.5, 129.9, 135.0, 143.3, 167.6; HRMS (ESI)  $m/z$ :  $[M-H]^-$  Calcd for  $\text{C}_{12}\text{H}_{10}\text{O}_4$  217.0506; Found 217.0515.

### 1,3,5-benzenetriacrylic acid (**4j**)

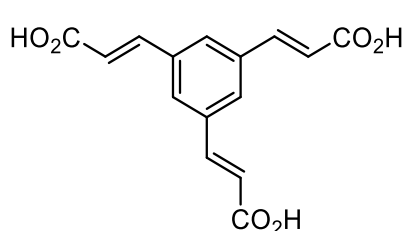

40% (19.3 mg, 67.0  $\mu\text{mol}$ ) from **3j** (167  $\mu\text{mol}$ ) brown solid;  $^1\text{H}$  NMR (DMSO- $d_6$ , 400 MHz)  $\delta$  6.78 (d,  $J$  = 16.0 Hz, 3H), 7.60 (d,  $J$  = 16.4 Hz, 3H), 8.08 (s, 3H), 12.35 (s, 3H);  $^{13}\text{C}$  NMR could not detect peaks due to very low solubility; HRMS (ESI)  $m/z$ :  $[M-2\text{H}]^{2-}$  Calcd for  $\text{C}_{15}\text{H}_{10}\text{O}_6$  143.0244; Found 143.0241.

### piperonylic acid

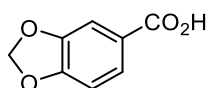

80% (66.2 mg, 398  $\mu\text{mol}$ ) white solid,  $R_f$  = 0.11 ( $\text{CHCl}_3/\text{MeOH}$  = 20/1);  $^1\text{H}$  NMR (DMSO- $d_6$ , 600 MHz)  $\delta$  6.12 (s, 2H), 7.00 (d,  $J$  = 8.4 Hz, 1H), 7.36 (d,  $J$  = 1.8 Hz, 1H), 7.54 (dd,  $J$  = 1.8, 8.4 Hz, 1H), 12.77 (s, 1H);  $^{13}\text{C}$  NMR (DMSO- $d_6$ , 150 MHz)  $\delta$  102.0, 108.1, 108.8, 124.6, 125.0, 147.5, 151.2, 166.6; HRMS (ESI)  $m/z$ :  $[M-\text{H}]^-$  Calcd for  $\text{C}_8\text{H}_5\text{O}_4$  165.0193; Found 165.0187.

### felbinac

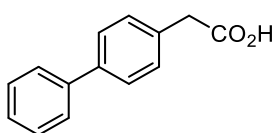

45% (35.5 mg, 166  $\mu\text{mol}$ ) light yellow solid,  $R_f$  = 0.11 ( $\text{CHCl}_3/\text{MeOH}$  = 20/1);  $^1\text{H}$  NMR ( $\text{CDCl}_3$ , 600 MHz)  $\delta$  3.71 (s, 2H), 7.35–7.38 (m, 3H), 7.42–7.45 (m, 2H), 7.56–7.59 (m, 4H);  $^{13}\text{C}$  NMR ( $\text{CDCl}_3$ , 150 MHz)  $\delta$  40.6, 127.2, 127.5, 127.6, 128.9, 129.9, 132.4, 140.5, 140.8, 176.5; HRMS (ESI)  $m/z$ :  $[M-\text{H}]^-$  Calcd for  $\text{C}_{14}\text{H}_{11}\text{O}_2$  211.0765; Found 211.0760.

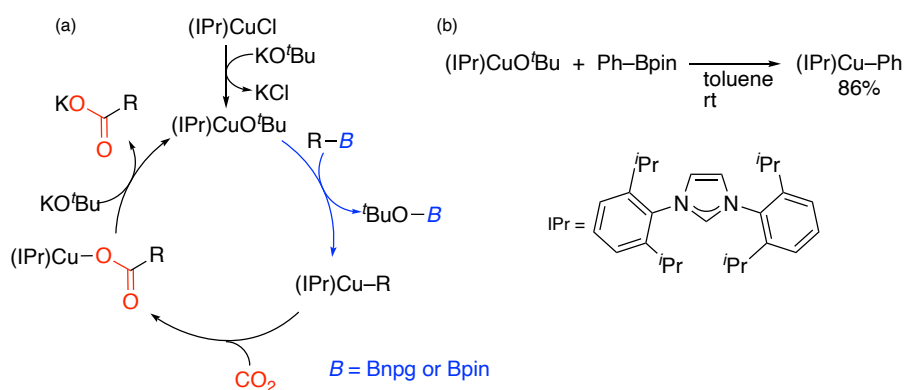

**Scheme S1** (a) A proposed reaction mechanism for the Cu-catalyzed carboxylation of boronic esters.<sup>24</sup> (b) Stoichiometric transmetalation of (IPr)CuO<sup>t</sup>Bu with PhBpin.<sup>25</sup> IPr = 1,3-bis(2,6-diisopropylphenyl)imidazol-2-ylidene.

## [C] References.

- (1) S. M. Kim, S. Y. Byeon, S.-H. Hwang and J. Y. Lee, *Chem. Commun.*, 2015, **51**, 10672–10675.
- (2) D. Alezi, Y. Belmabkhout, M. Suyetin, P. M. Bhatt, Ł. J. Weseliński, V. Solovyeva, K. Adil, I. Spanopoulos, P. N. Trikalitis, A.-H. Emwas and M. Eddaoudi, *J. Am. Chem. Soc.*, 2015, **137**, 13308–13318.
- (3) A. G. Crawford, Z. Liu, I. A. I. Mkhaliid, M.-H. Thibault, N. Schwarz, G. Alcaraz, A. Steffen, J. C. Collings, A. S. Batsanov, J. A. K. Howard and T. B. Marder, *Chem. Eur. J.*, 2012, **18**, 5022–5035.
- (4) A. K. Jaladi, H. S. Choi and D. K. An, *New J. Chem.*, 2020, **44**, 13626–13632.
- (5) H. E. Ho, N. Asao, Y. Yamamoto and T. Jin, *Org. Lett.*, 2014, **16**, 4670–4673.
- (6) W. Chen, M. Ji, H. Cheng, M. Zheng, F. Xia, W. Min, H. Yang, X. Wang, L. Wang, L. Cao, K. Yuan, and P. Yang, *J. Med. Chem.*, 2022, **65**, 15102–15122.
- (7) Z. Qiu, M. Zhu, L. Zheng, J. Li, D. Zou, Y. Wu and Y. Wu, *Tetrahedron Lett.*, 2019, **60**, 1321–1324.
- (8) S. H. Kim, K. H. Kim and S. H. Hong, *Angew. Chem., Int. Ed.*, 2014, **53**, 771–774.
- (9) Y. Makida, E. Marelli, A. M. Z. Slawin and S. P. Nolan, *Chem. Commun.*, 2014, **50**, 8010–8013.
- (10) A. Correa and R. Martin, *J. Am. Chem. Soc.*, 2009, **131**, 15974–15975.
- (11) O. S. Nayal, J. Hong, Y. Yang and F. Mo, *Org. Chem. Front.*, 2019, **6**, 3673–3677.
- (12) M. Gao, Y. Yang, H. Chen and B. Zhou, *Adv. Synth. Catal.*, 2018, **360**, 100–105.
- (13) B. A. Dalvi and P. D. Lokhande, *Tetrahedron Lett.*, 2018, **59**, 2145–2149.
- (14) S. Tang, M. Rauch, M. Montag, Y. Diskin-Posner, Y. Ben-David and D. Milstein, *J. Am. Chem. Soc.*, 2020, **142**, 20875–20882.
- (15) E. M. Serum, S. Selvakumar, N. Zimmermann and M. P. Sibi, *Green. Chem.*, 2018, **20**, 1448–1454.
- (16) D. M. Connor, S. D. Allen, D. M. Collard, C. L. Liotta and D. A. Schiraldi, *J. Org. Chem.*, 1999, **64**, 6888–6890.
- (17) C. V. Pham, R. S. Macomber, H. B. Mark Jr. and H. Zimmer, *J. Org. Chem.*, 1984, **49**, 5250–5253.
- (18) D.-W. Yoon, D. E. Gross, V. M. Lynch, J. L. Sessler, B. P. Hay and C.-H. Lee, *Angew. Chem., Int. Ed.*, 2008, **47**, 5038–5042.
- (19) A. Gevorgyan, K. H. Hopmann and A. Bayer, *ChemSusChem*, 2020, **13**, 2080–2088.
- (20) D. J. Fansher and D. R. J. Palmer, *Angew. Chem., Int. Ed.*, 2023, **62**, e202214539.
- (21) J. Takaya, S. Tadami, K. Ukai and N. Iwasawa, *Org. Lett.*, 2008, **10**, 2697–2700.
- (22) M. Liu and C. J. Li, *Angew. Chem., Int. Ed.*, 2016, **55**, 10806–10810.
- (23) J. Qian, Z. Xu, P. Zhu, C. Meng, Y. Liu, W. Shan, A. He, Y. Gu, F. Ran, Y. Zhang and Y. Ling, *J. Nat. Prod.*, 2021, **84**, 3161–3168.
- (24) T. Ohishi, M. Nishiura and Z. Hou, *Angew. Chem., Int. Ed.*, 2008, **47**, 5792–5795.
- (25) J. Plotzitzka and C. Kleeberg, *Inorg. Chem.*, 2016, **55**, 4813–4823.



## [D] Comparison with the Reported Reaction Conditions

We conducted the Cu-catalyzed carboxylation under Bayer's reaction condition in a stainless autoclave. Unfortunately, we could not reproduce the high yields they achieved by using a specialized glassware (Scheme S2). In addition, double carboxylation did not take place at all under the reaction condition (Scheme S3).

### (a) Carboxylation under our optimized condition (this work)

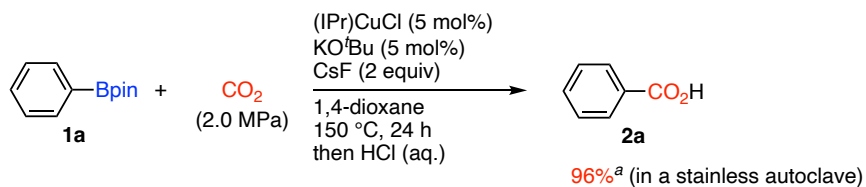

### (b) Carboxylation under Bayer's condition in 1,4-dioxane

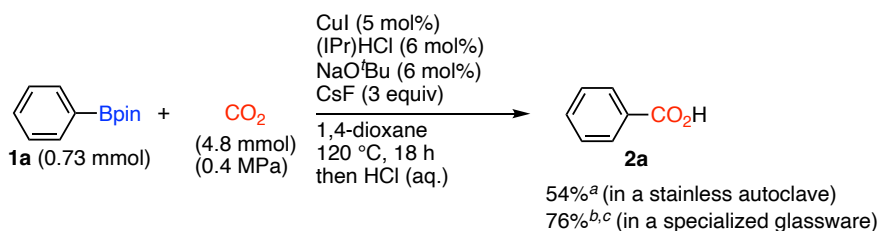

### (c) Carboxylation under Bayer's condition in methylal

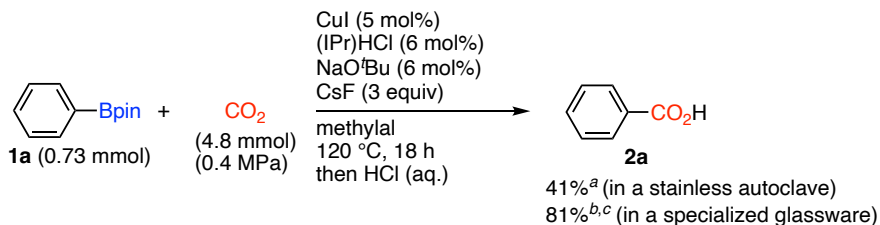

<sup>a</sup> NMR yield. <sup>b</sup> Isolated yield. <sup>c</sup> Reference data: *Chem. Eur. J.*, 2020, **26**, 6064.

## Scheme S2

### (a) Double carboxylation under our optimized condition (this work)

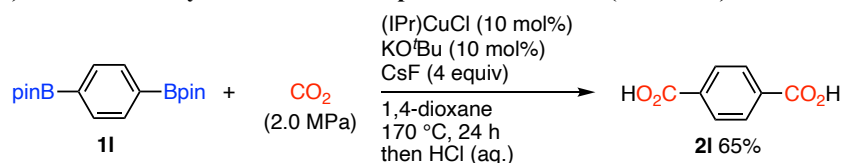

### (b) Double carboxylation under Bayer's condition in 1,4-dioxane

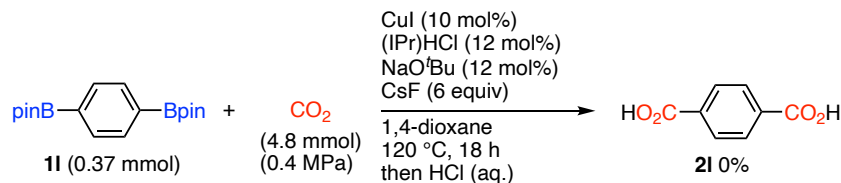

### (c) Double carboxylation under Bayer's condition in methylal

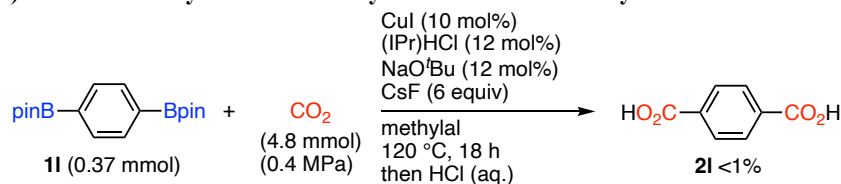

## Scheme S3

## [E] NMR Spectra

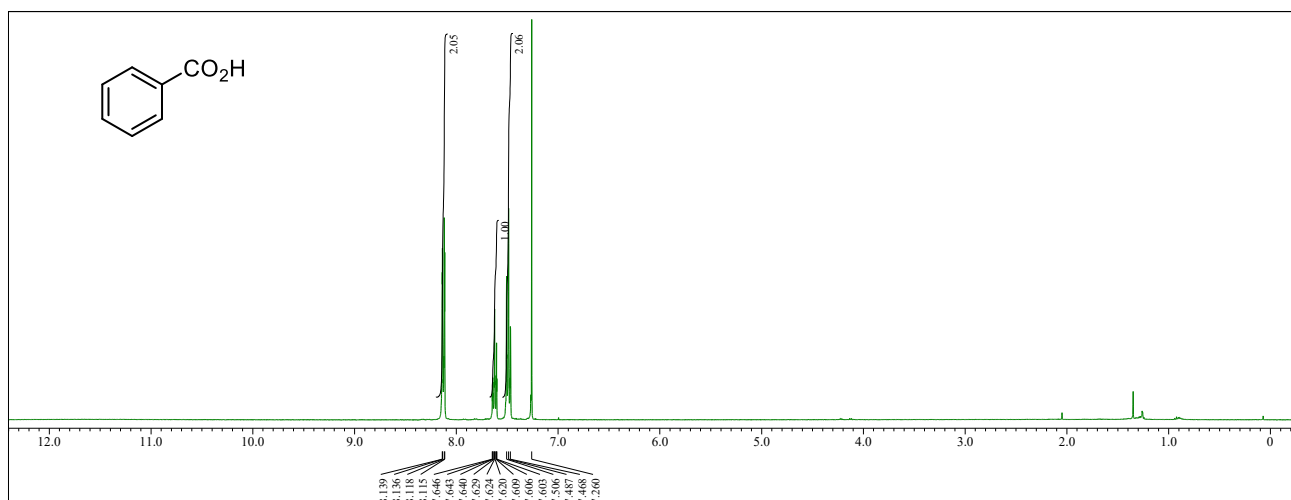

400 MHz  $^1\text{H}$  NMR spectrum of **2a** in  $\text{CDCl}_3$ .

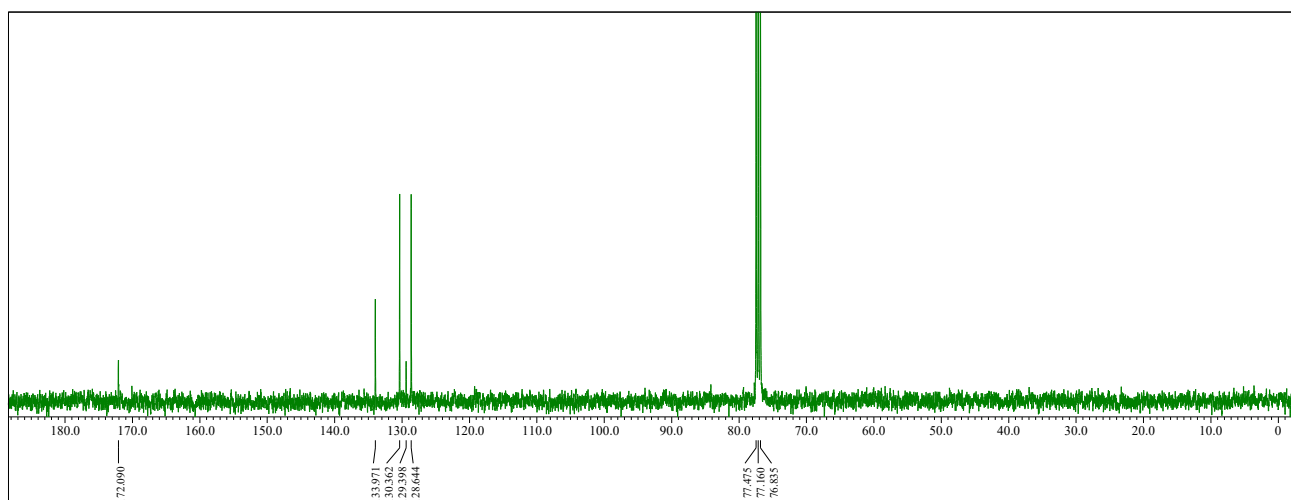

100 MHz  $^{13}\text{C}$  NMR spectrum of **2a** in  $\text{CDCl}_3$ .

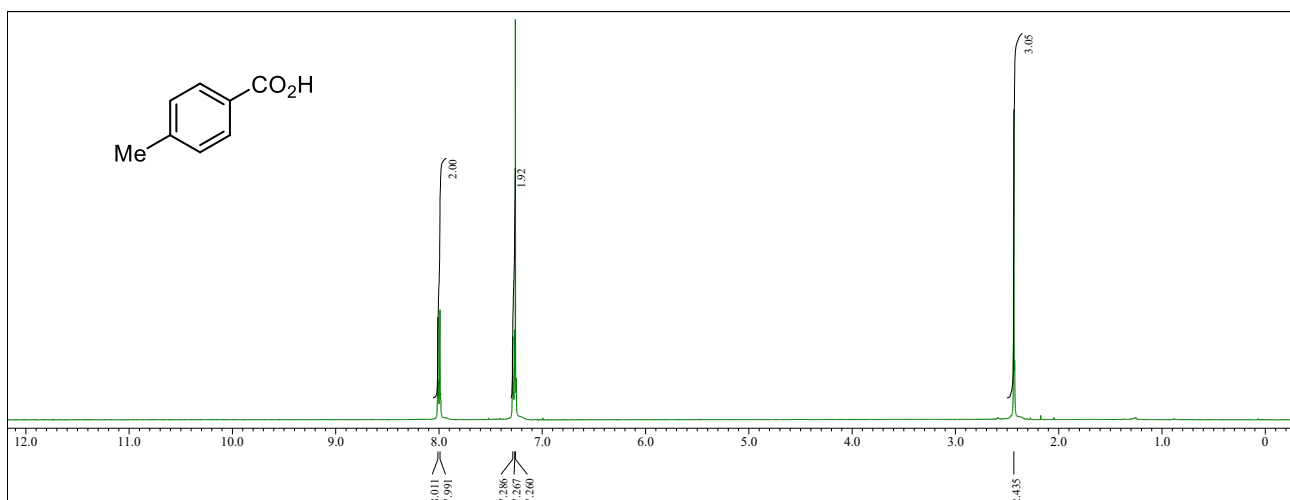

400 MHz  $^1\text{H}$  NMR spectrum of **2b** in  $\text{CDCl}_3$ .

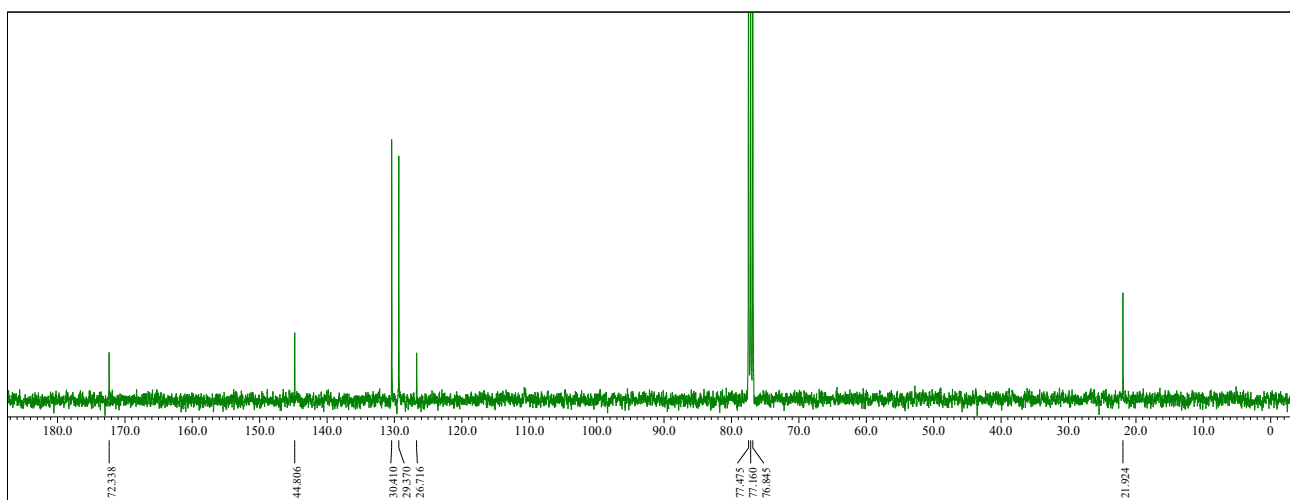

100 MHz  $^{13}\text{C}$  NMR spectrum of **2b** in  $\text{CDCl}_3$ .

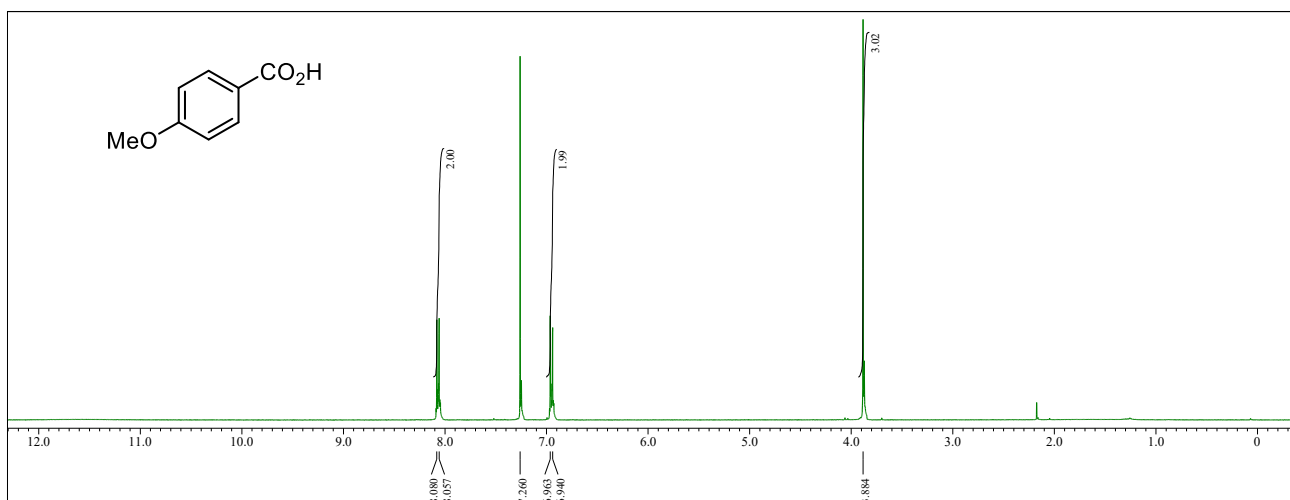

400 MHz  $^1\text{H}$  NMR spectrum of **2c** in  $\text{CDCl}_3$ .

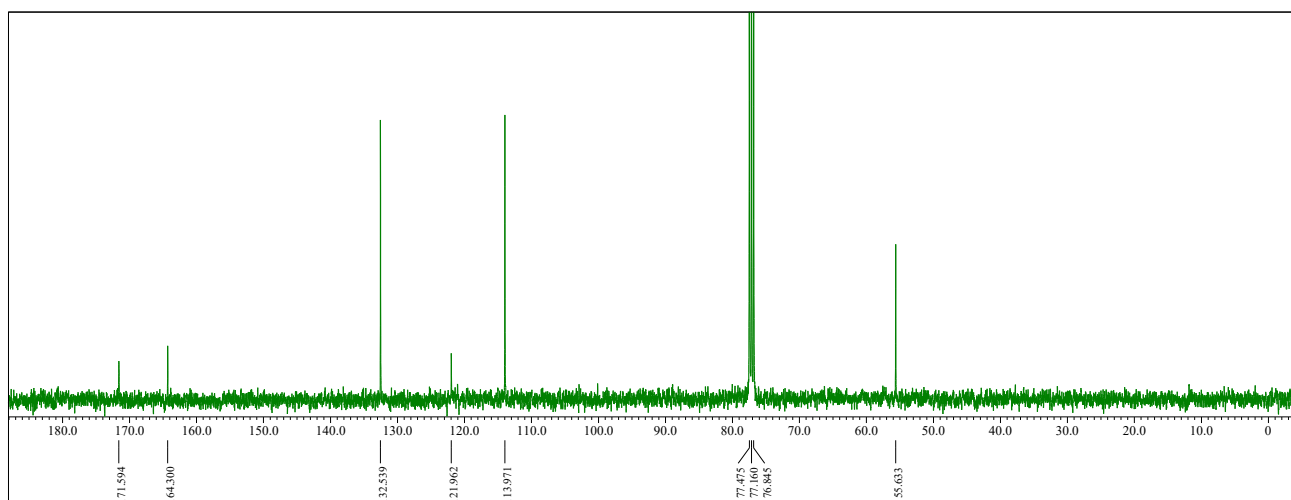

100 MHz  $^{13}\text{C}$  NMR spectrum of **2c** in  $\text{CDCl}_3$ .

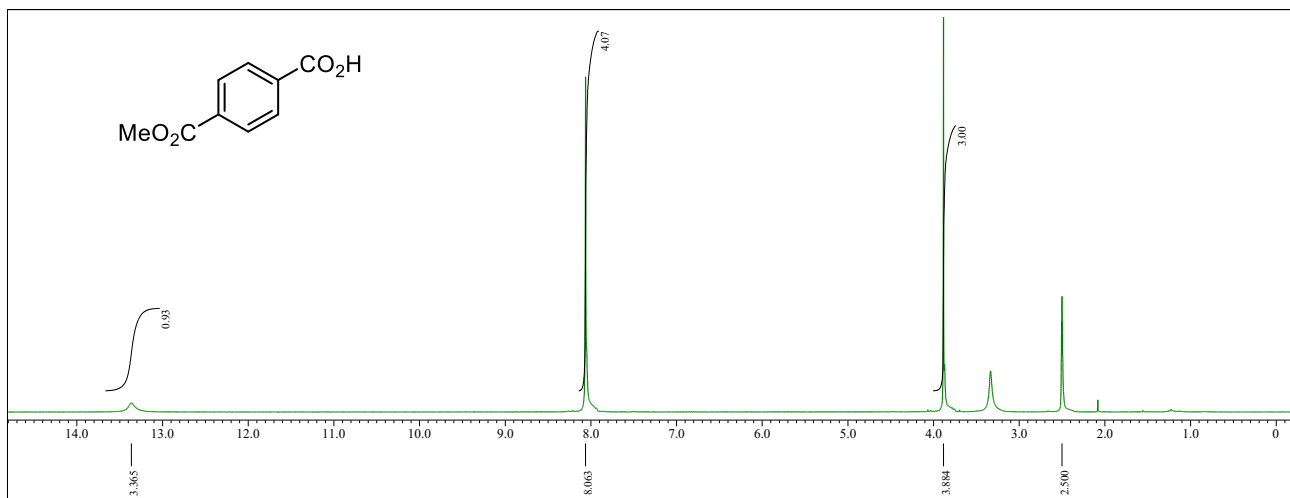

400 MHz  $^1\text{H}$  NMR spectrum of **2d** in  $\text{DMSO-}d_6$ .

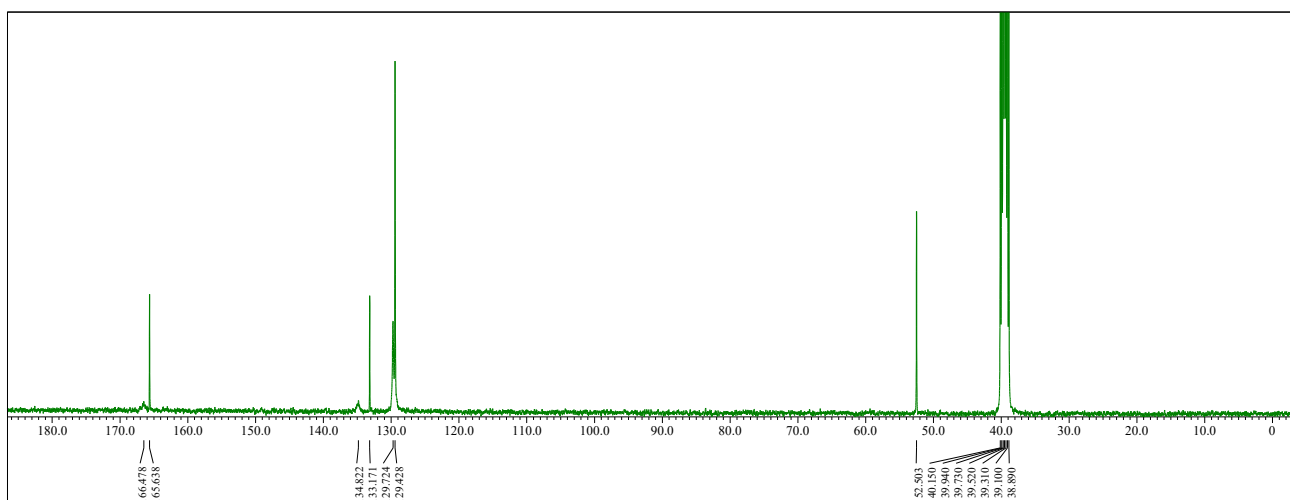

100 MHz  $^{13}\text{C}$  NMR spectrum of **2d** in  $\text{DMSO-}d_6$ .

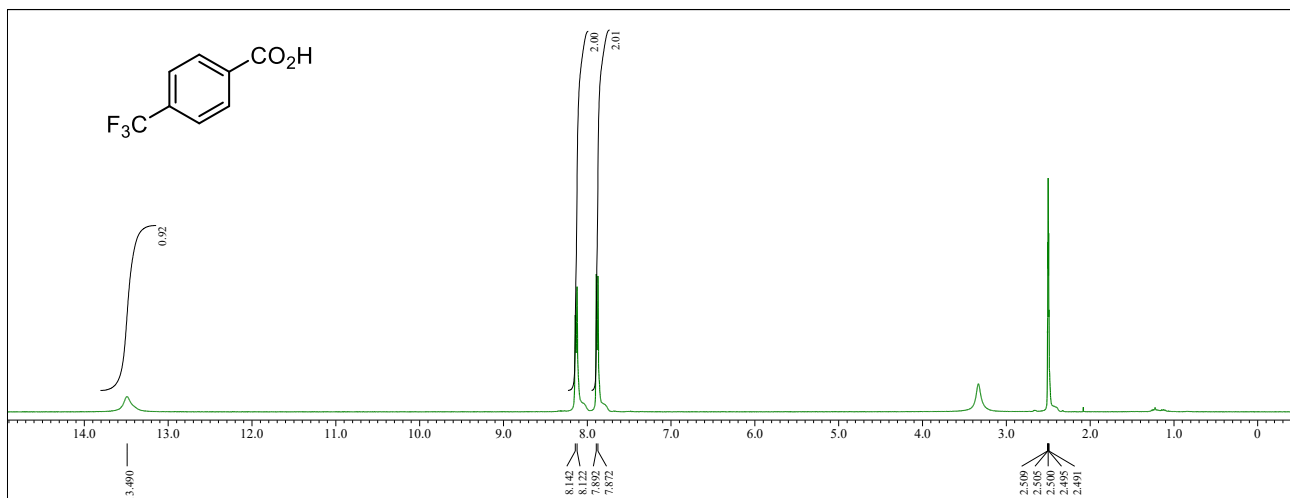

400 MHz  $^1\text{H}$  NMR spectrum of **2e** in  $\text{DMSO-}d_6$ .

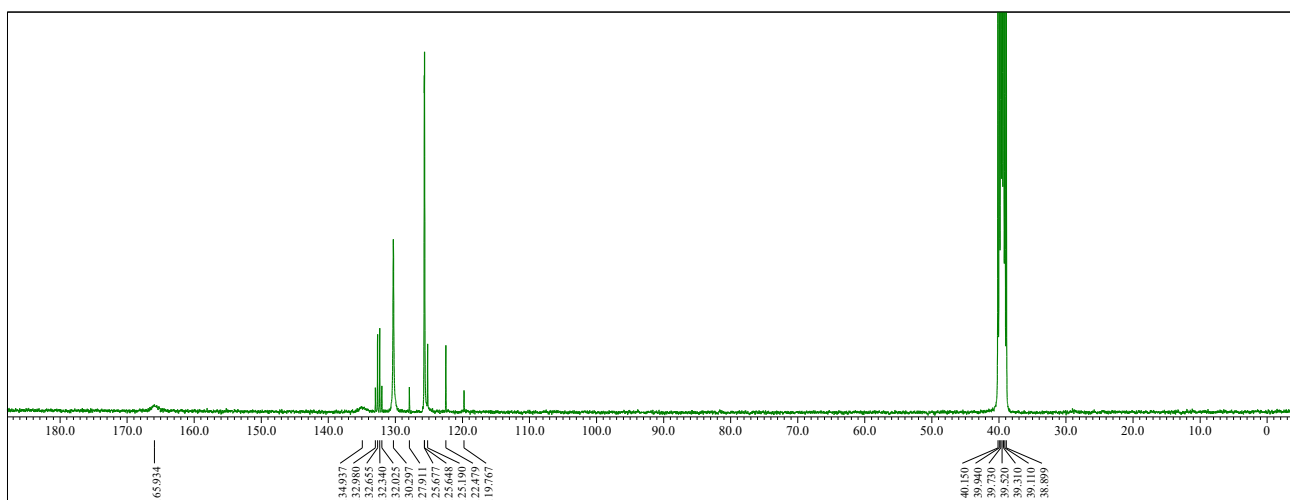

100 MHz  $^{13}\text{C}$  NMR spectrum of **2e** in  $\text{DMSO-}d_6$ .

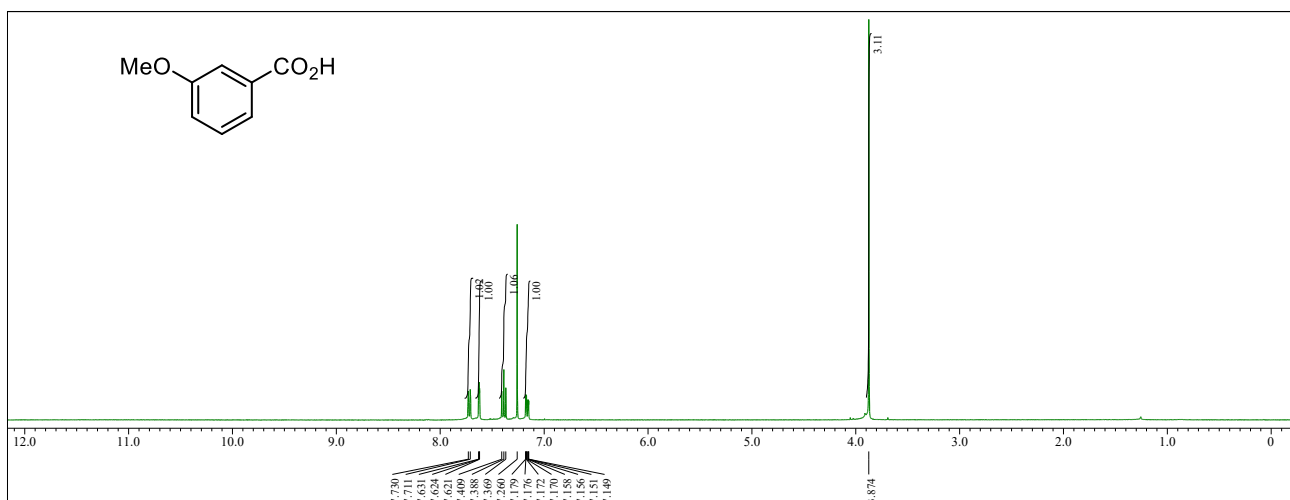

400 MHz  $^1\text{H}$  NMR spectrum of **2f** in  $\text{CDCl}_3$ .

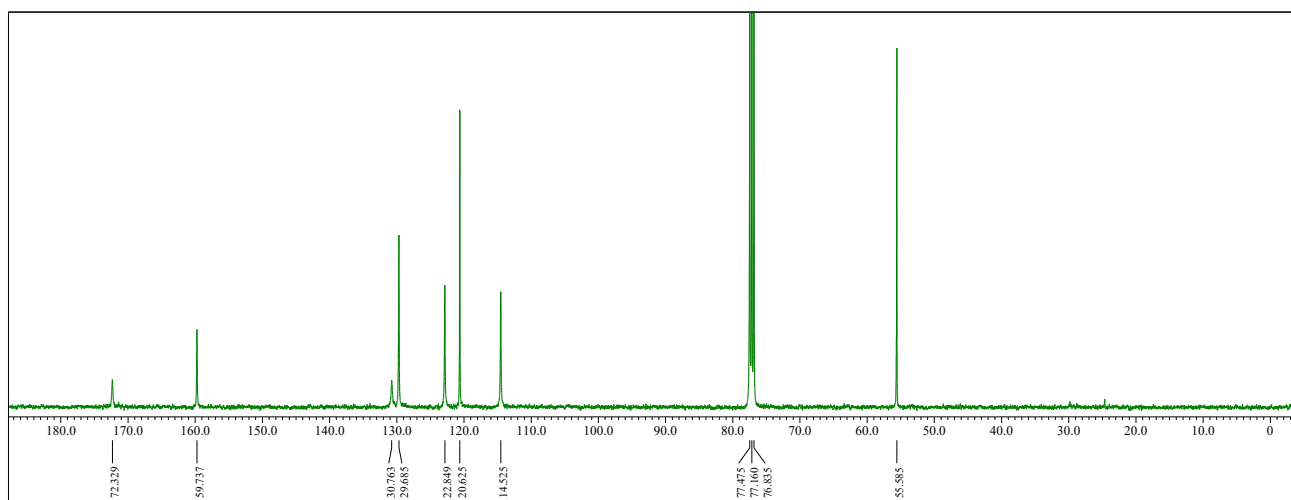

100 MHz  $^{13}\text{C}$  NMR spectrum of **2f** in  $\text{CDCl}_3$ .

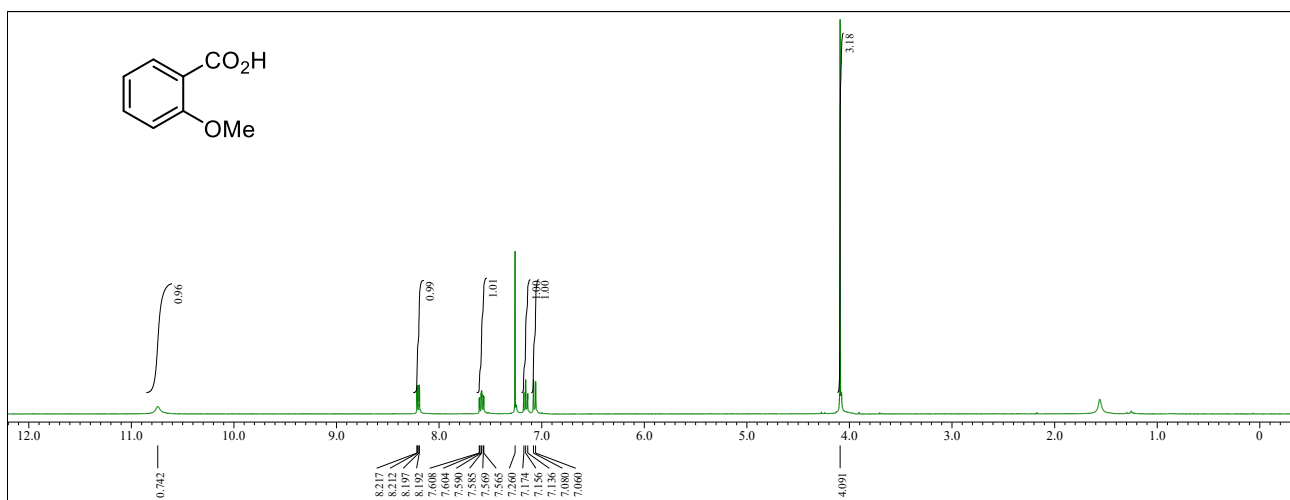

400 MHz  $^1\text{H}$  NMR spectrum of **2g** in  $\text{CDCl}_3$ .

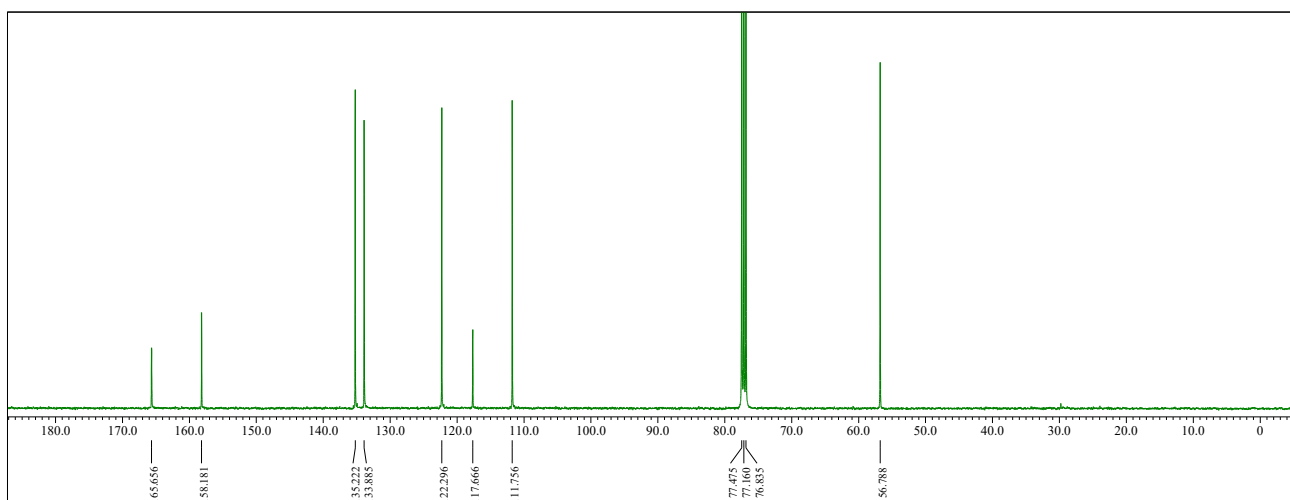

100 MHz  $^{13}\text{C}$  NMR spectrum of **2g** in  $\text{CDCl}_3$ .



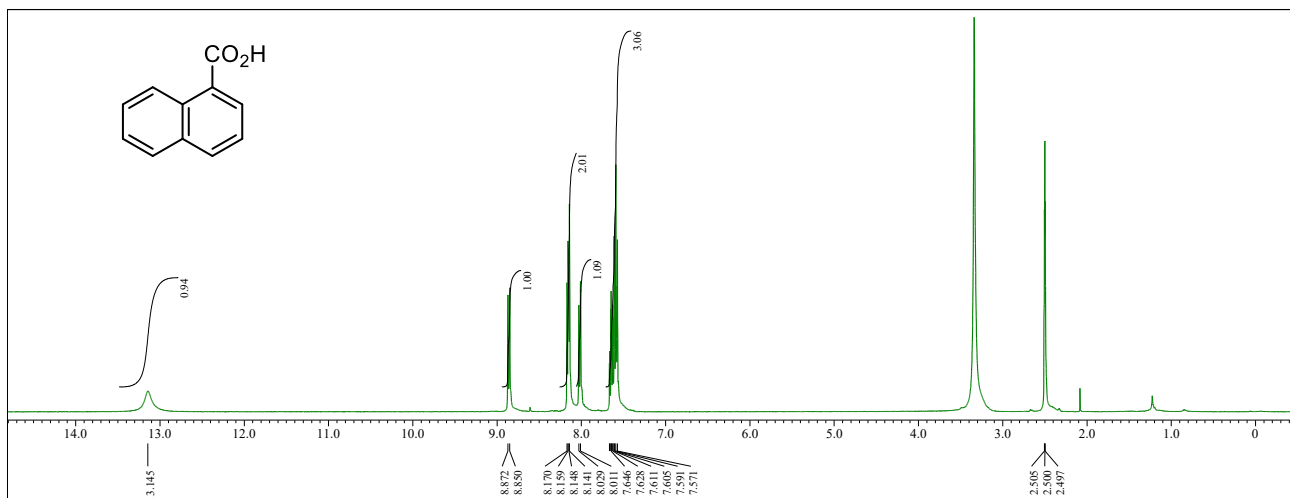

400 MHz  $^1\text{H}$  NMR spectrum of **2h** in  $\text{DMSO-}d_6$ .

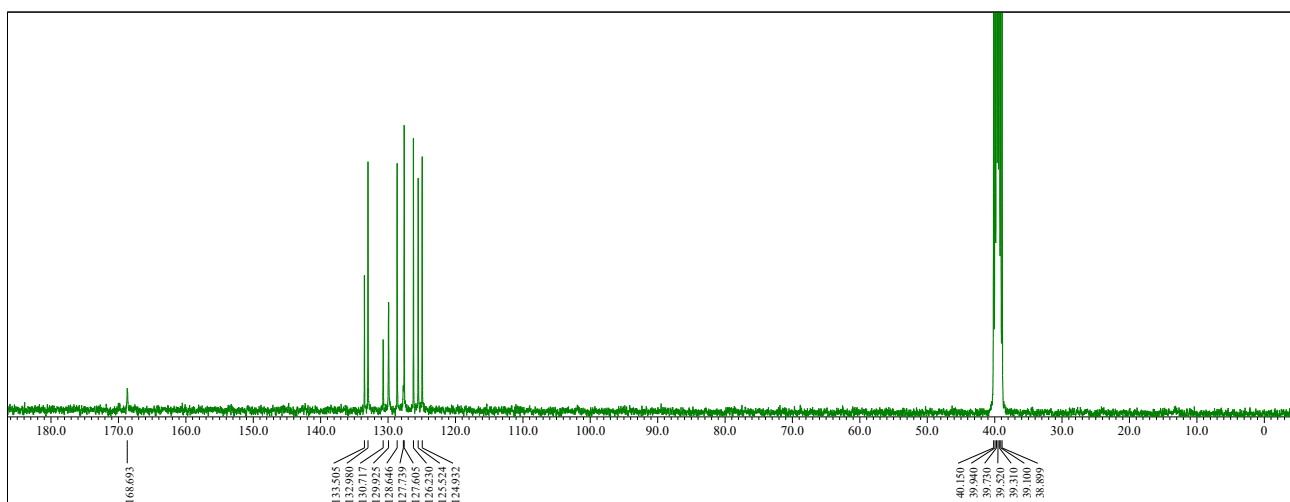

100 MHz  $^{13}\text{C}$  NMR spectrum of **2h** in  $\text{DMSO-}d_6$ .

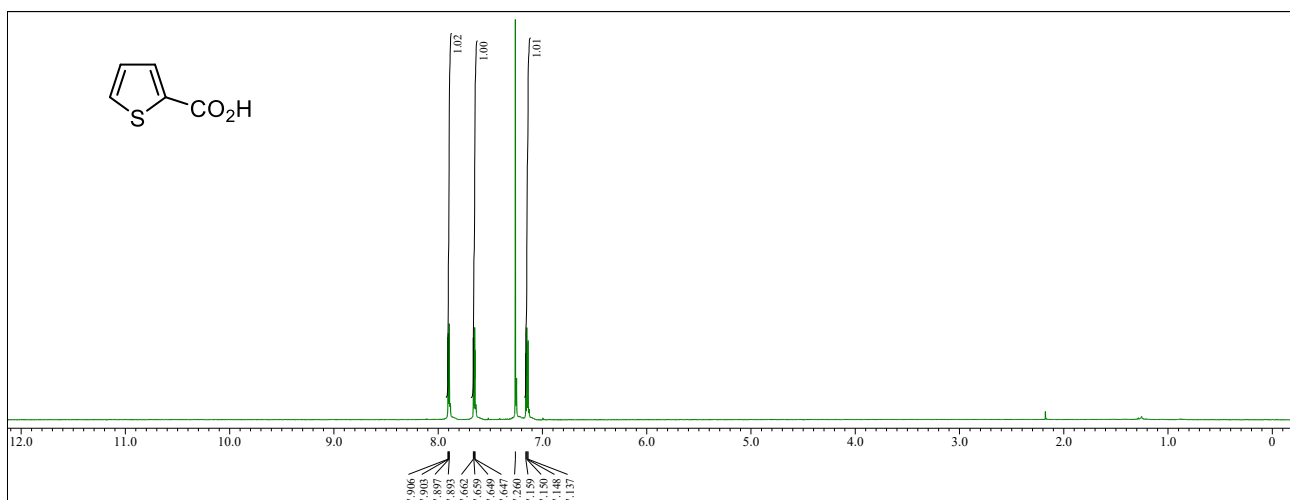

400 MHz  $^1\text{H}$  NMR spectrum of **2i** in  $\text{CDCl}_3$ .

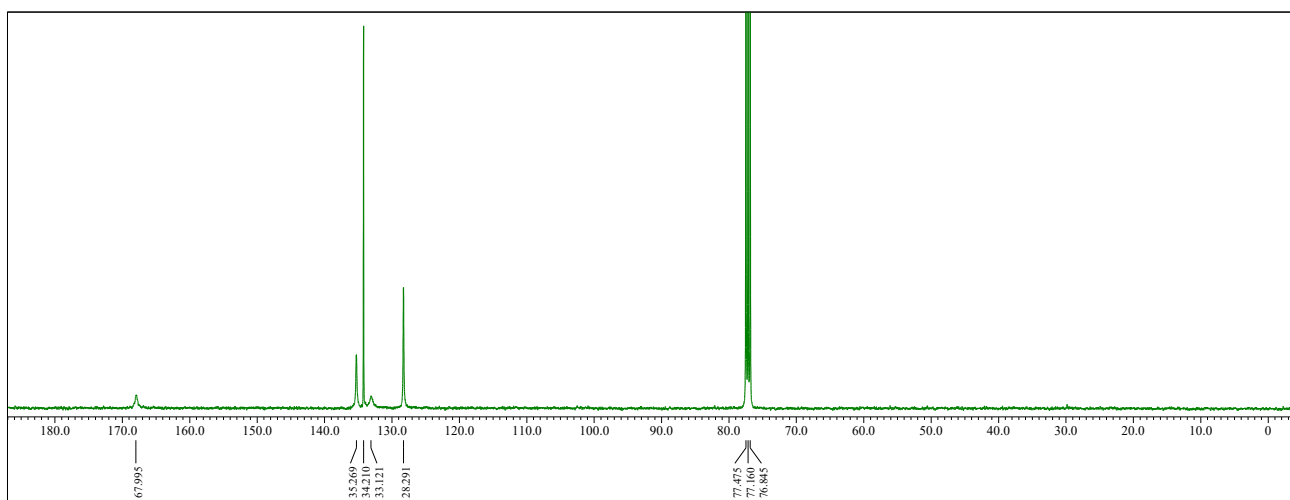

100 MHz  $^{13}\text{C}$  NMR spectrum of **2i** in  $\text{CDCl}_3$ .

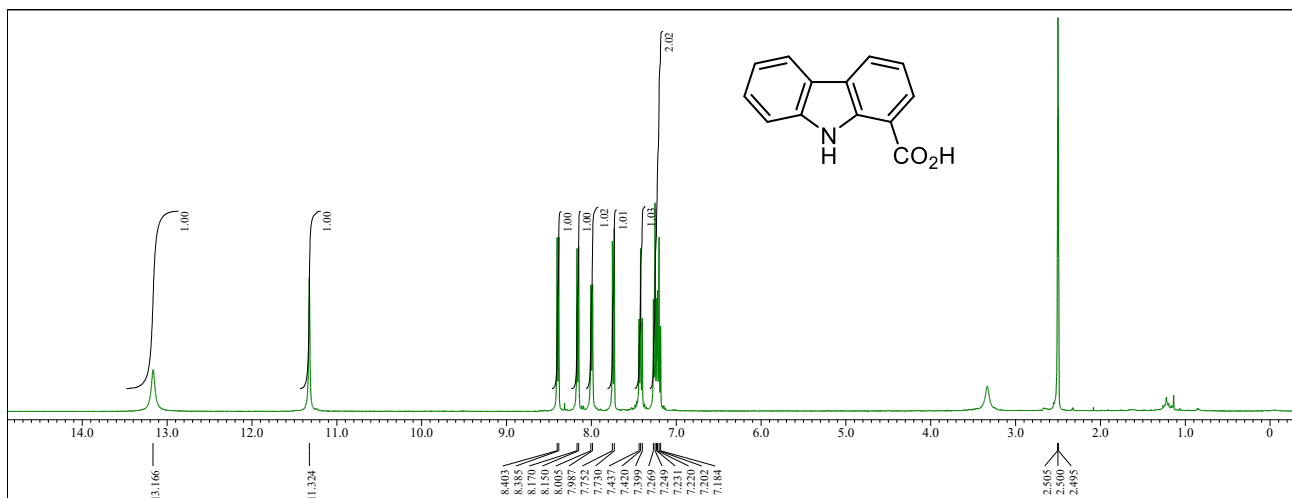

400 MHz  $^1\text{H}$  NMR spectrum of **2j** in  $\text{DMSO-}d_6$ .

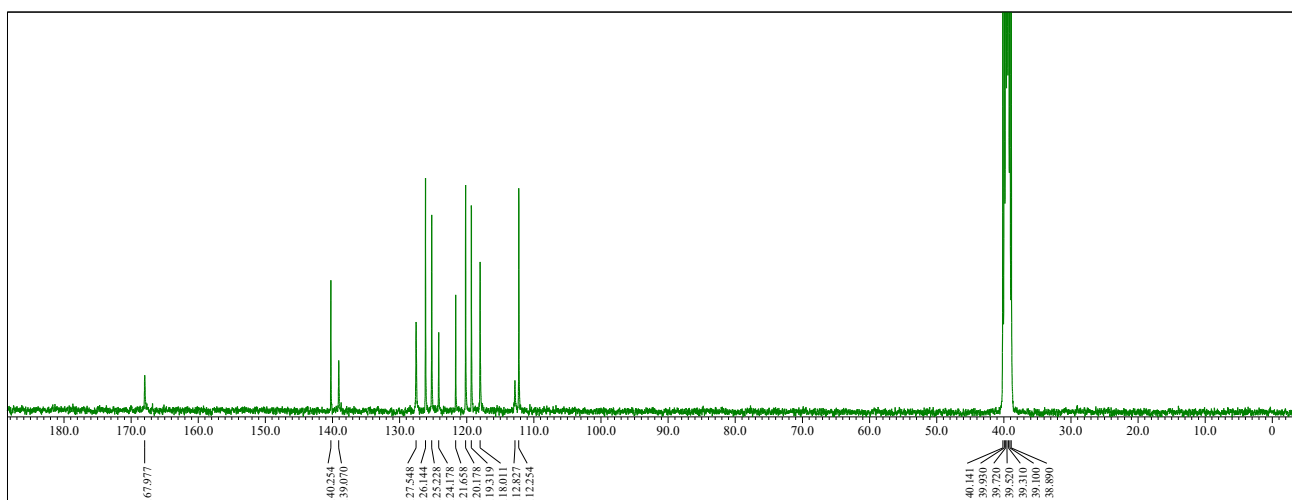

100 MHz  $^{13}\text{C}$  NMR spectrum of **2j** in  $\text{DMSO-}d_6$ .

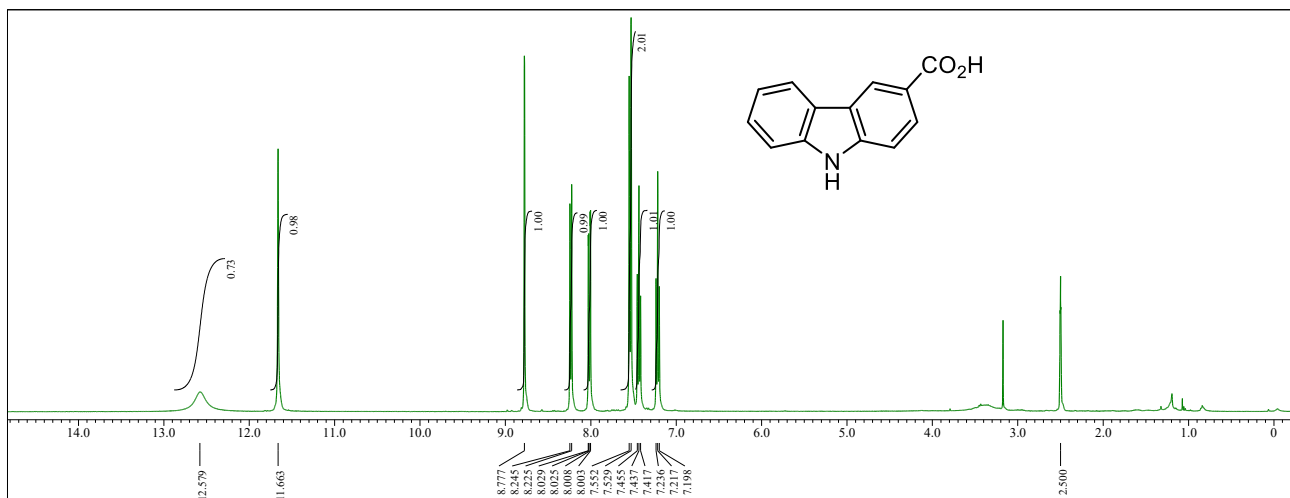

400 MHz  $^1\text{H}$  NMR spectrum of **2k** in  $\text{DMSO-}d_6$ .

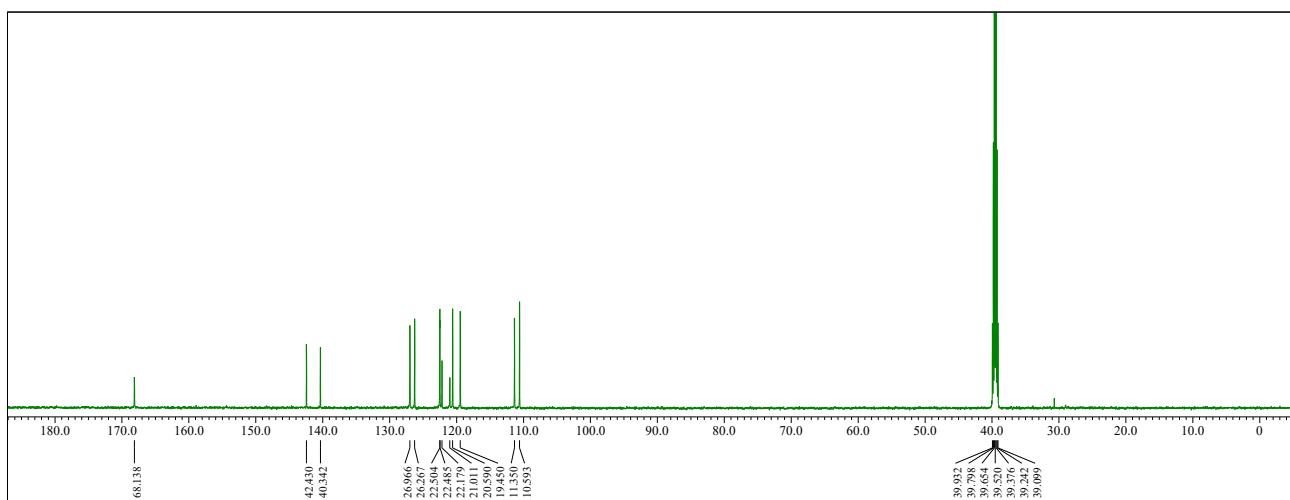

150 MHz  $^{13}\text{C}$  NMR spectrum of **2k** in  $\text{DMSO-}d_6$ .

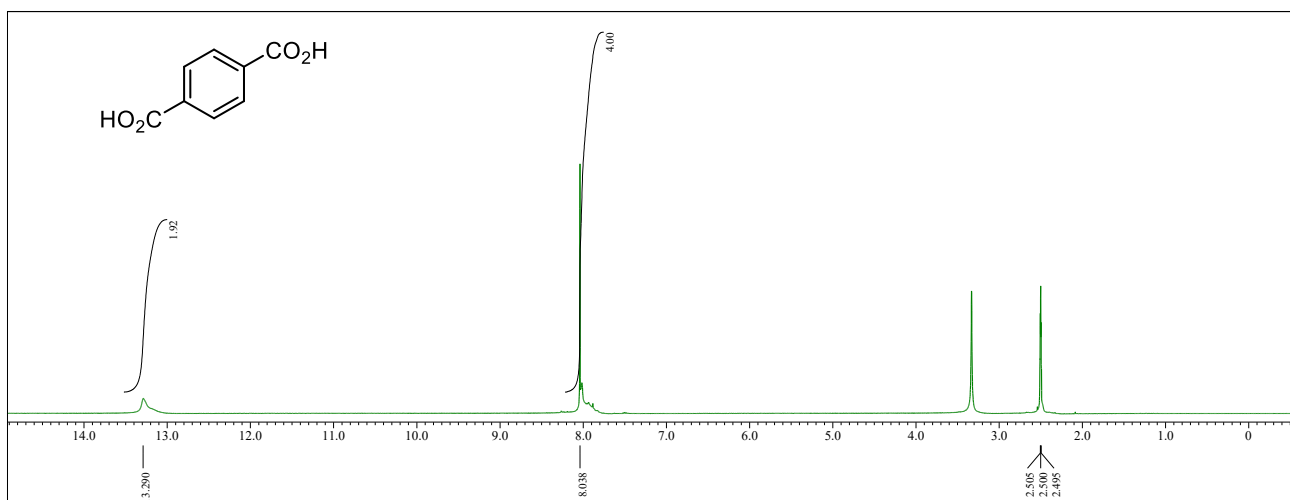

400 MHz  $^1\text{H}$  NMR spectrum of **21** in  $\text{DMSO-}d_6$ .

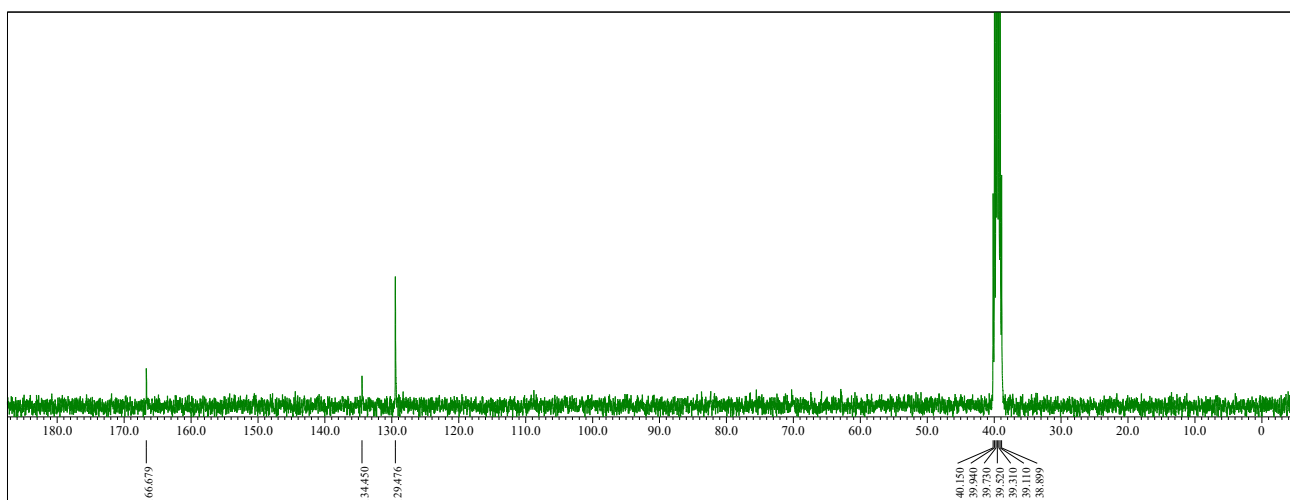

100 MHz  $^{13}\text{C}$  NMR spectrum of **21** in  $\text{DMSO-}d_6$ .

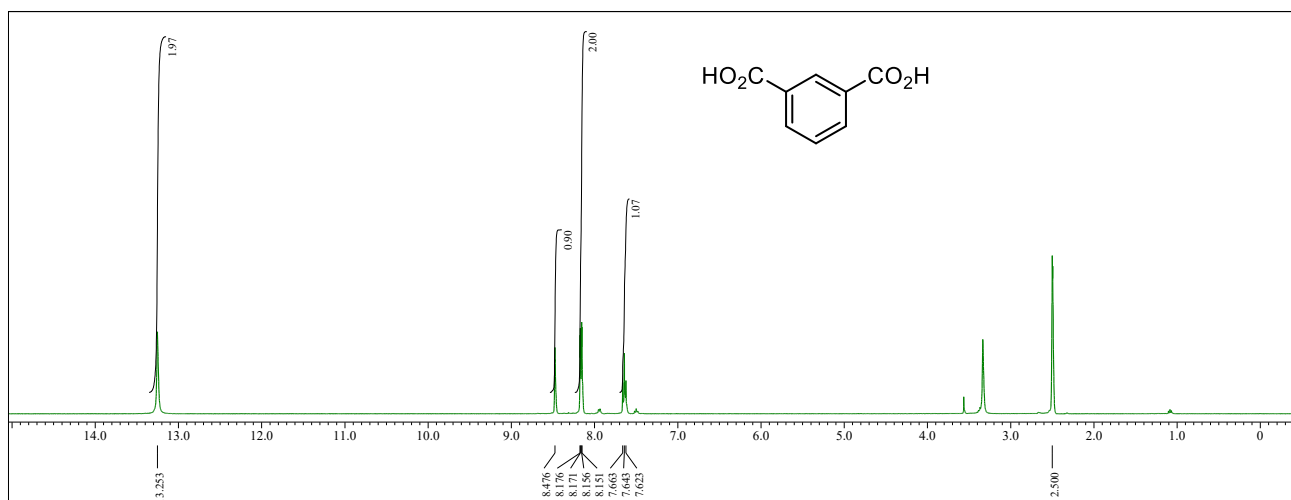

400 MHz  $^1\text{H}$  NMR spectrum of **2m** in  $\text{DMSO-}d_6$ .

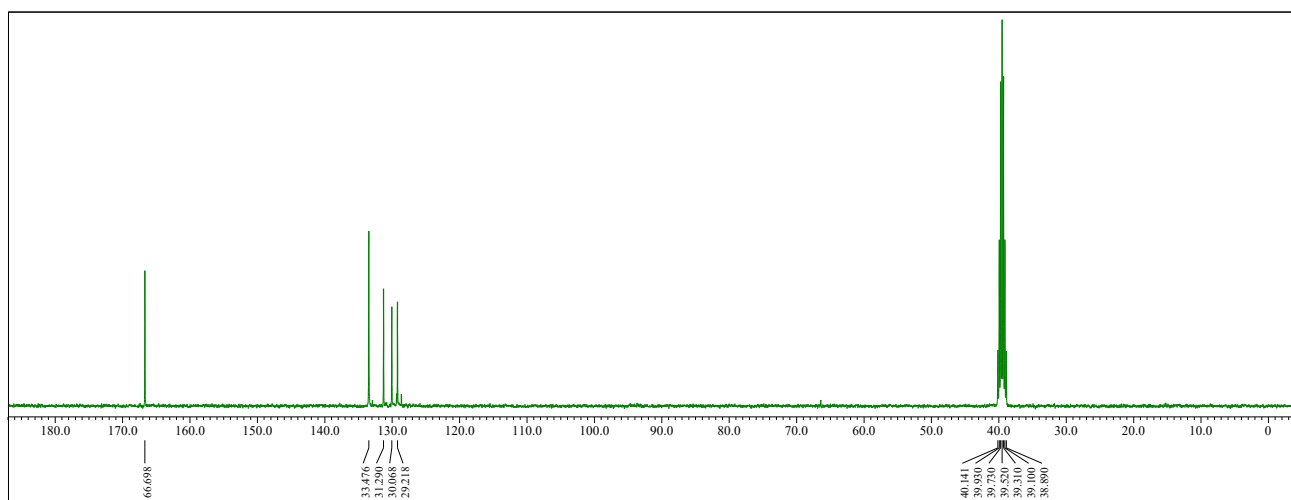

100 MHz  $^{13}\text{C}$  NMR spectrum of **2m** in  $\text{DMSO-}d_6$ .

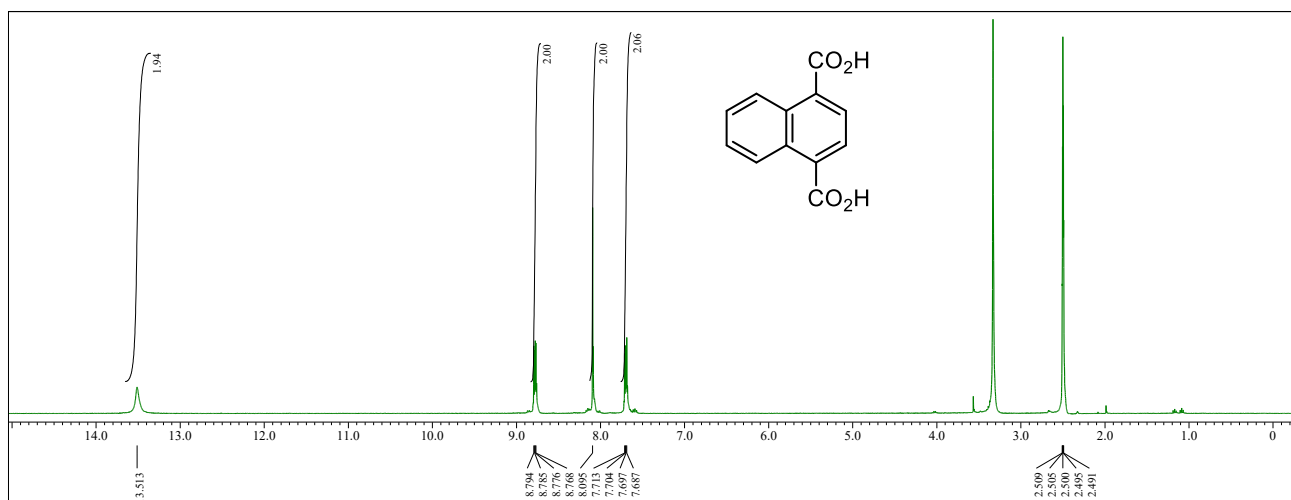

400 MHz  $^1\text{H}$  NMR spectrum of **2n** in  $\text{DMSO-}d_6$ .

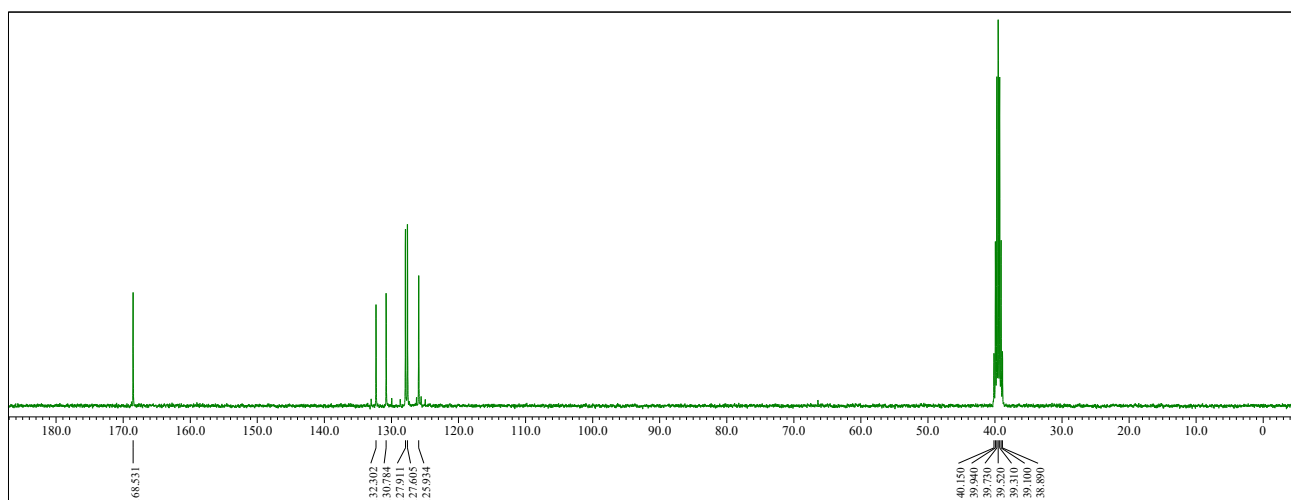

100 MHz  $^{13}\text{C}$  NMR spectrum of **2n** in  $\text{DMSO-}d_6$ .

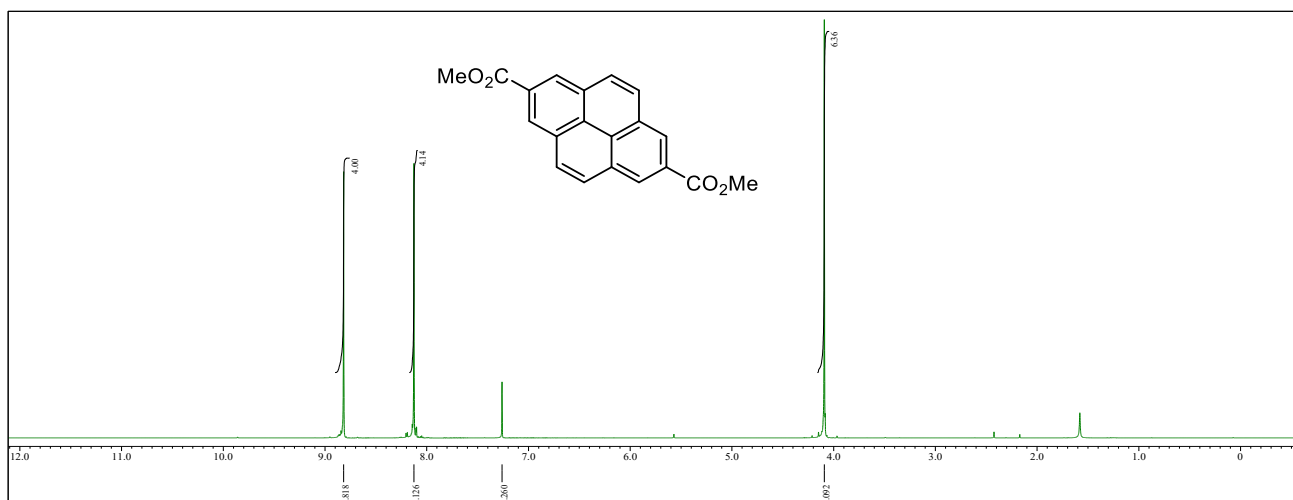

600 MHz  $^1\text{H}$  NMR spectrum of **20'** in  $\text{CDCl}_3$ .

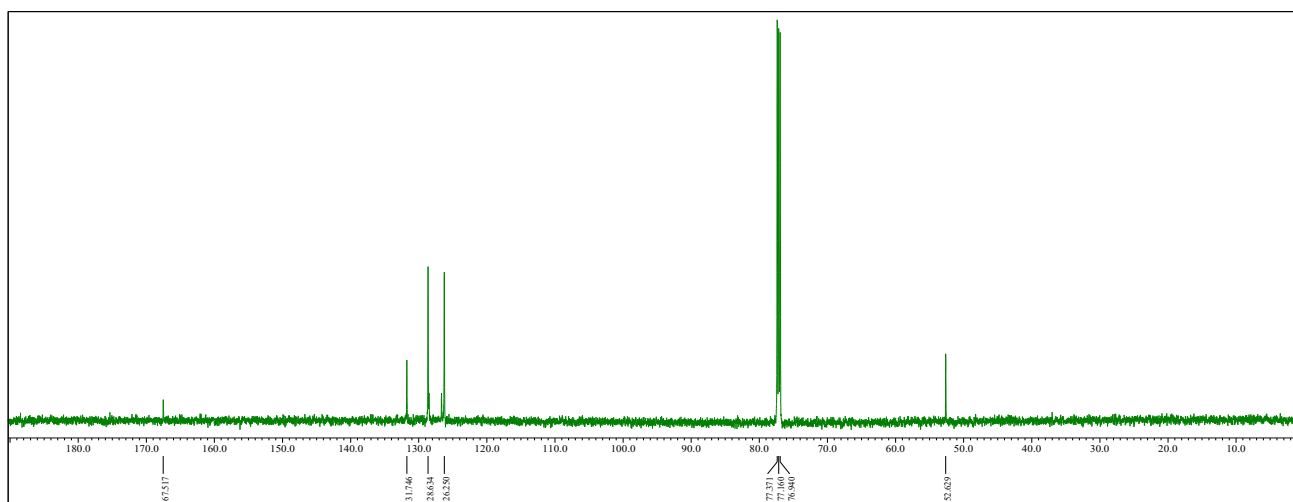

150 MHz  $^{13}\text{C}$  NMR spectrum of **20'** in  $\text{CDCl}_3$ .



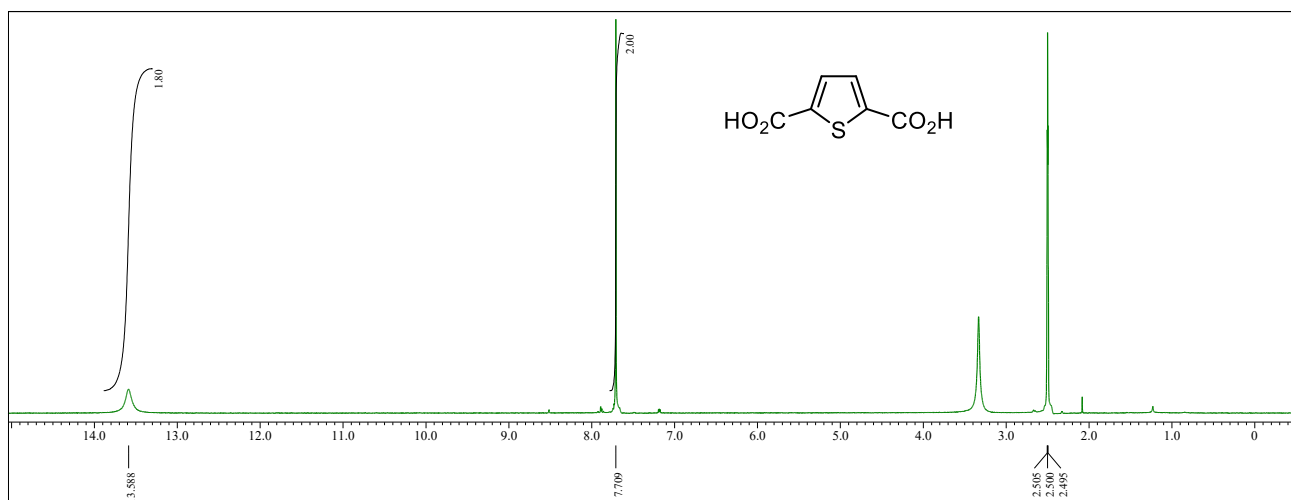

400 MHz  $^1\text{H}$  NMR spectrum of **2p** in  $\text{DMSO-}d_6$ .

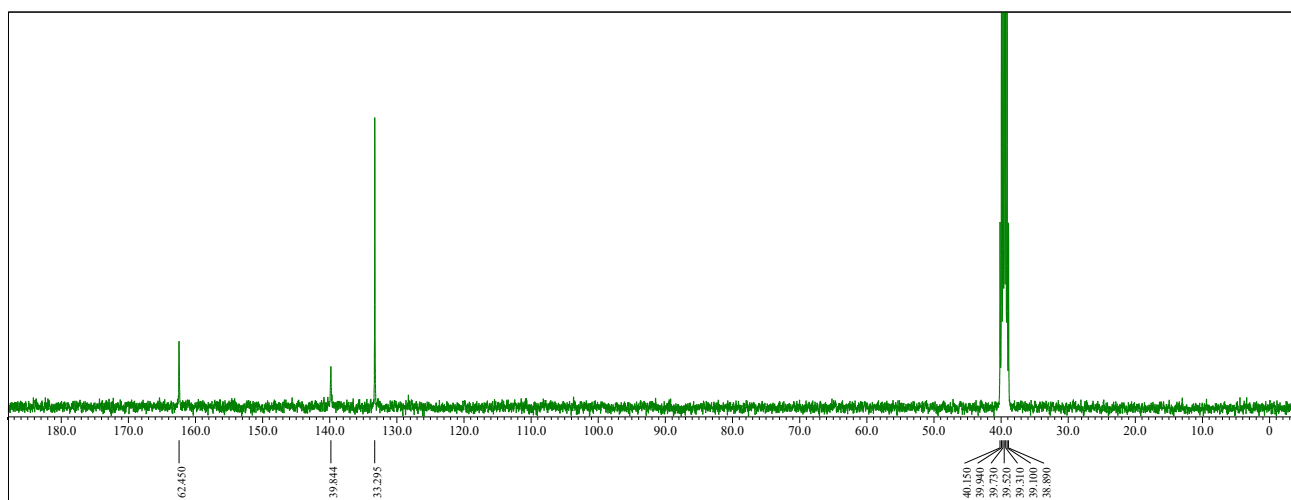

100 MHz  $^{13}\text{C}$  NMR spectrum of **2p** in  $\text{DMSO-}d_6$ .

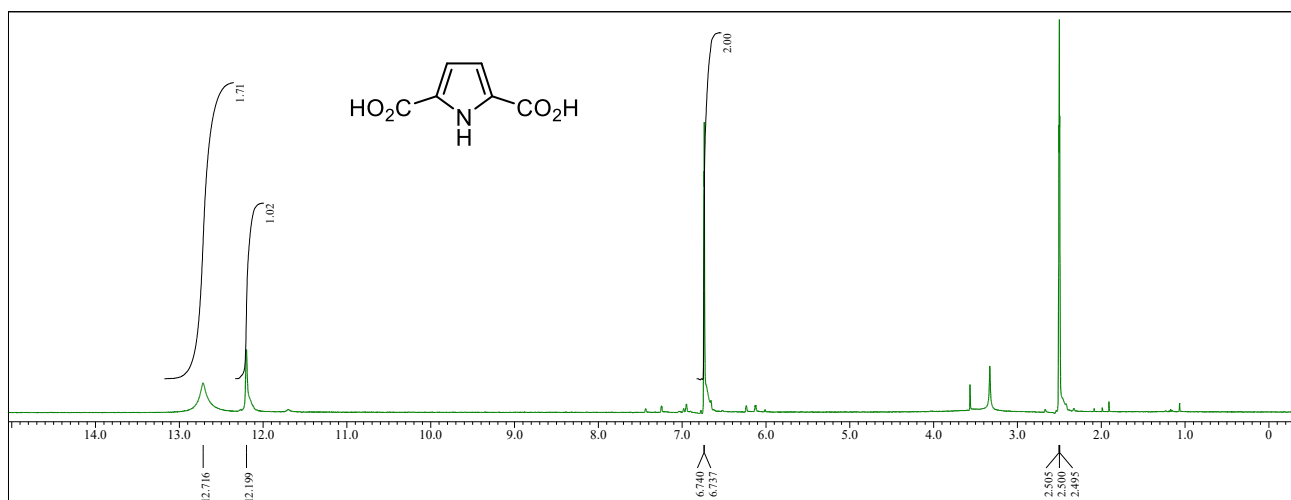

400 MHz  $^1\text{H}$  NMR spectrum of **2q** in  $\text{DMSO-}d_6$ .

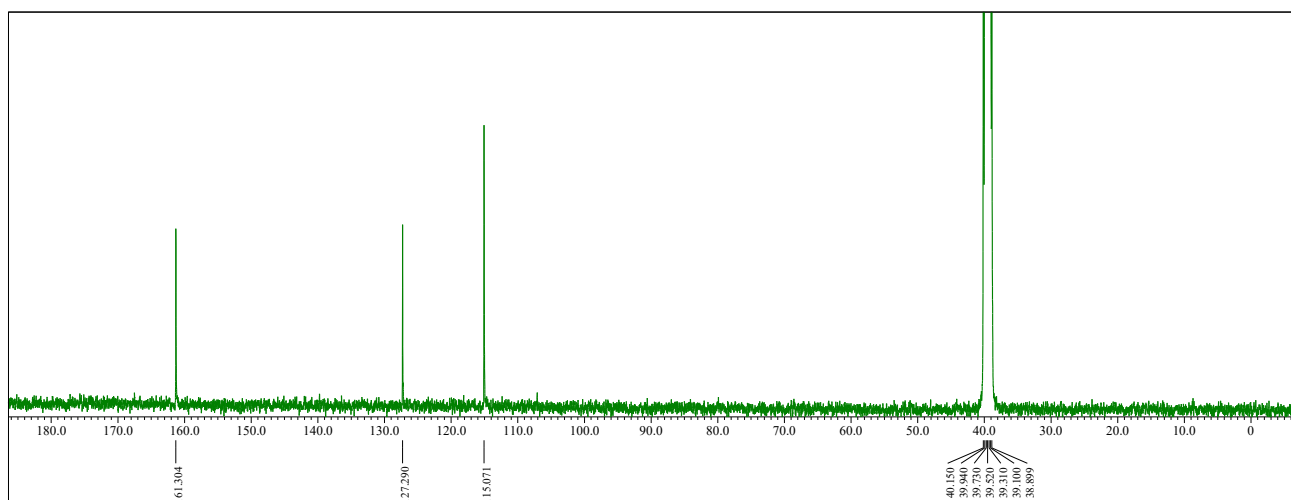

100 MHz  $^{13}\text{C}$  NMR spectrum of **2q** in  $\text{DMSO-}d_6$ .

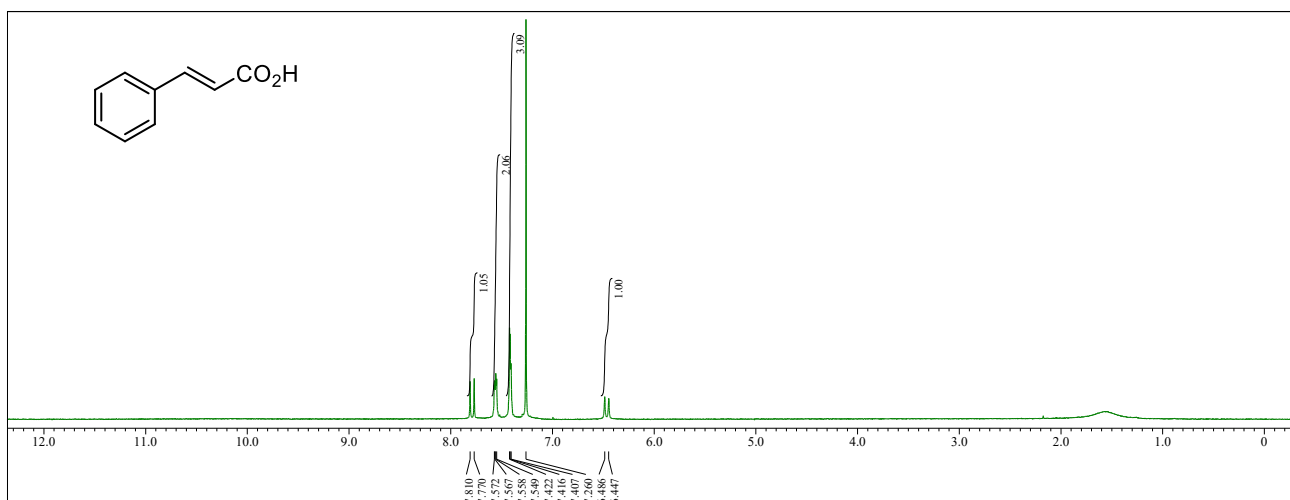

400 MHz  $^1\text{H}$  NMR spectrum of **4a** in  $\text{CDCl}_3$ .

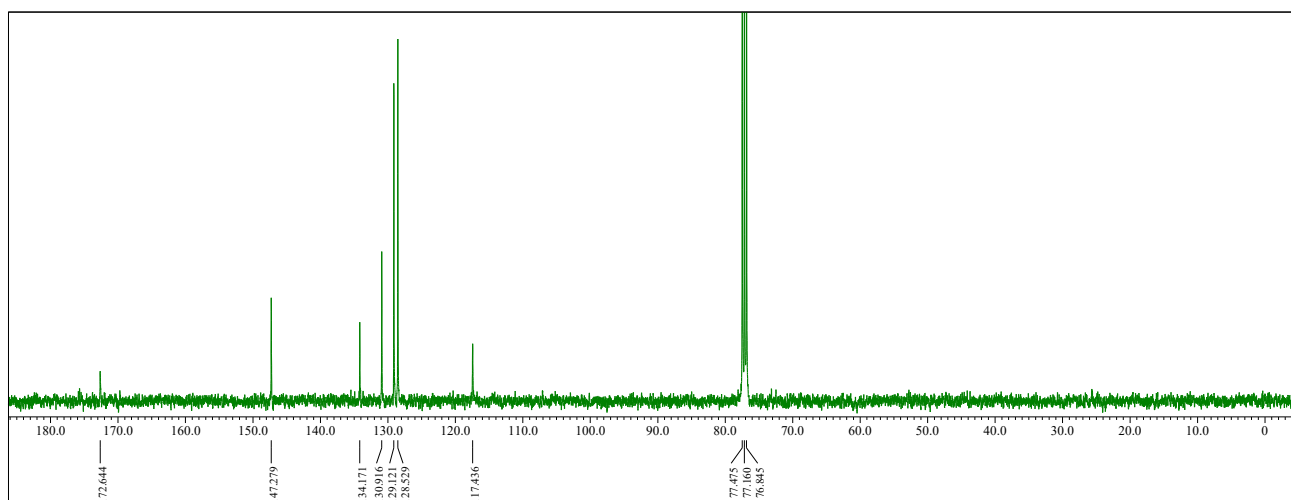

100 MHz  $^{13}\text{C}$  NMR spectrum of **4a** in  $\text{CDCl}_3$ .

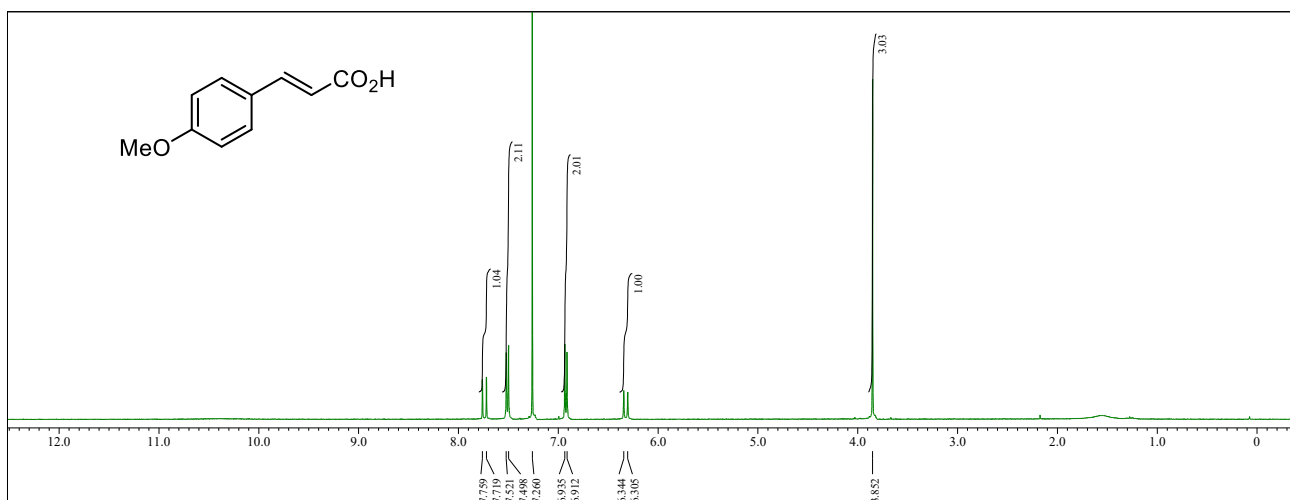

400 MHz  $^1\text{H}$  NMR spectrum of **4b** in  $\text{CDCl}_3$ .

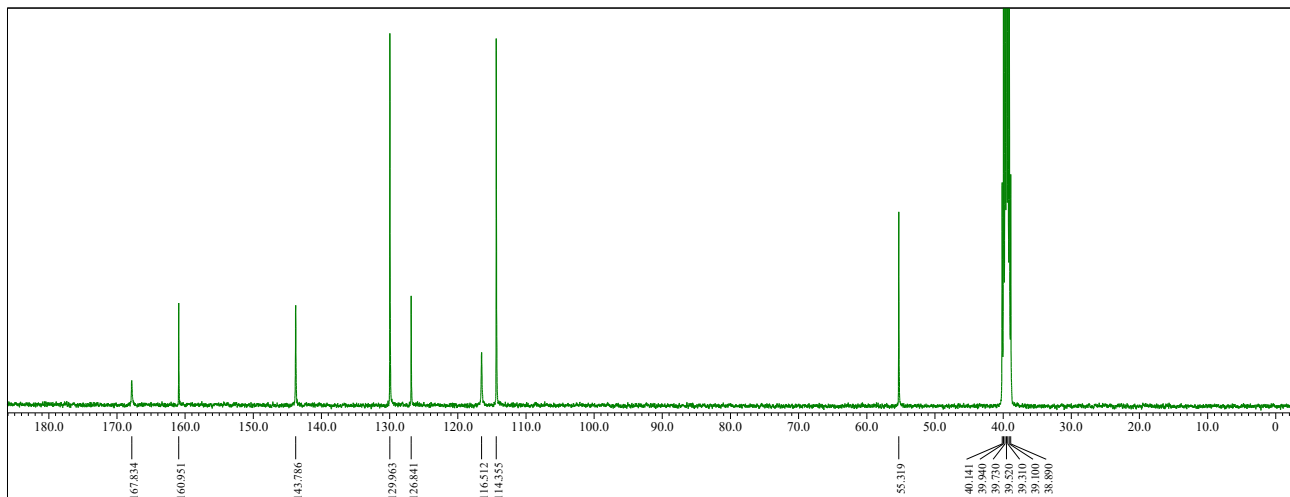

100 MHz  $^{13}\text{C}$  NMR spectrum of **4b** in  $\text{DMSO}-d_6$ .

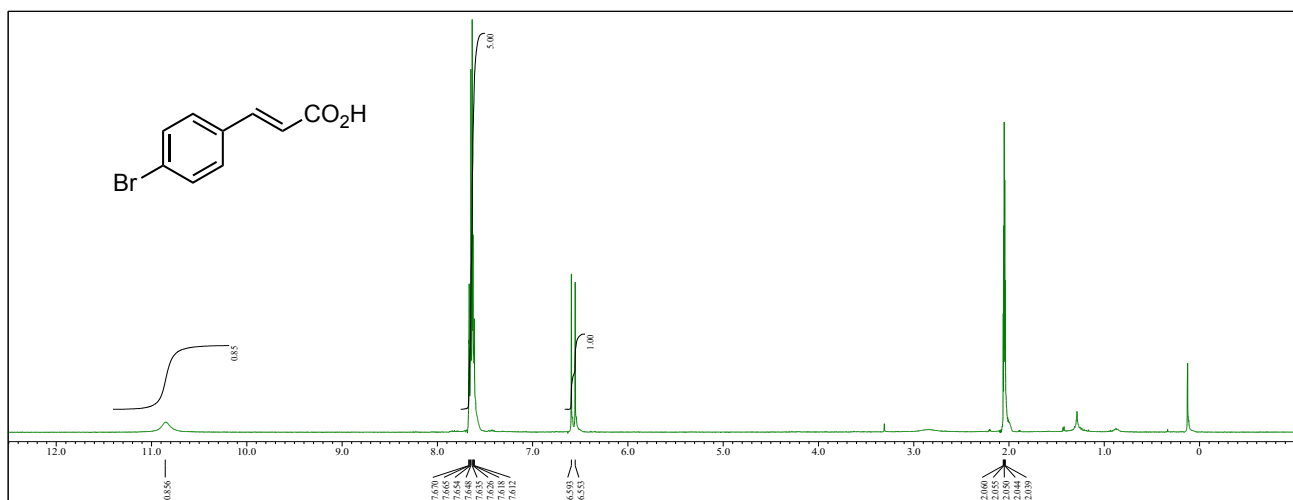

400 MHz  $^1\text{H}$  NMR spectrum of **4c** in acetone- $d_6$ .

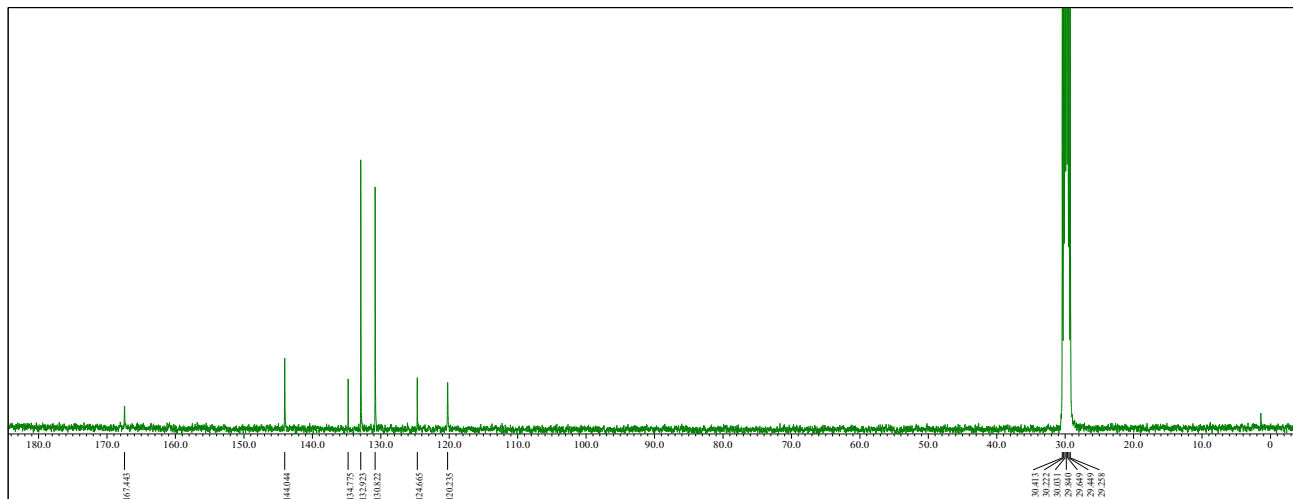

100 MHz  $^{13}\text{C}$  NMR spectrum of **4c** in acetone- $d_6$ .

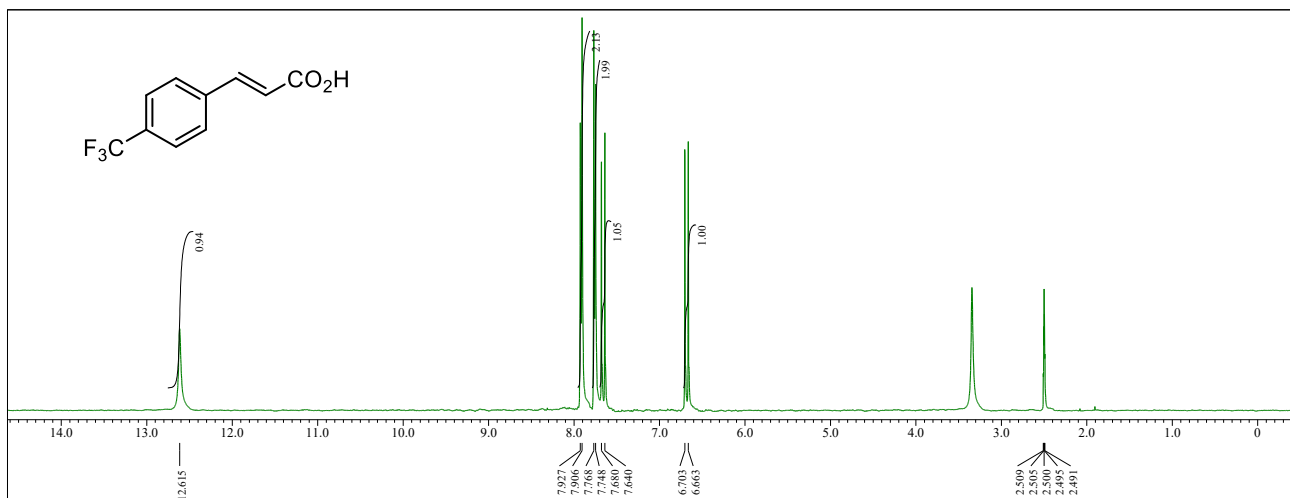

400 MHz  $^1\text{H}$  NMR spectrum of **4d** in  $\text{DMSO-}d_6$ .

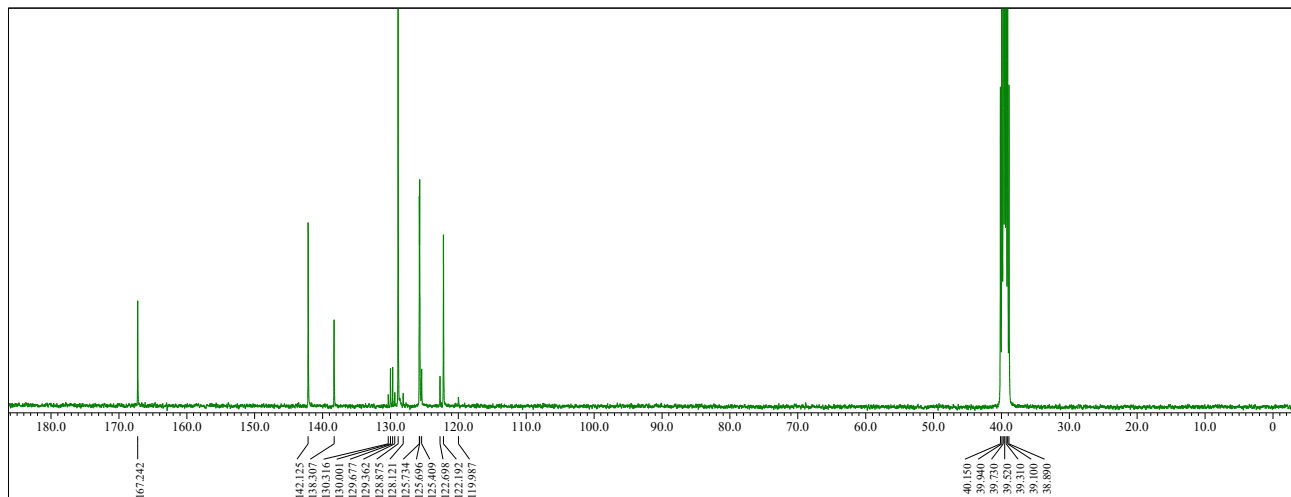

100 MHz  $^{13}\text{C}$  NMR spectrum of **4d** in  $\text{DMSO-}d_6$ .

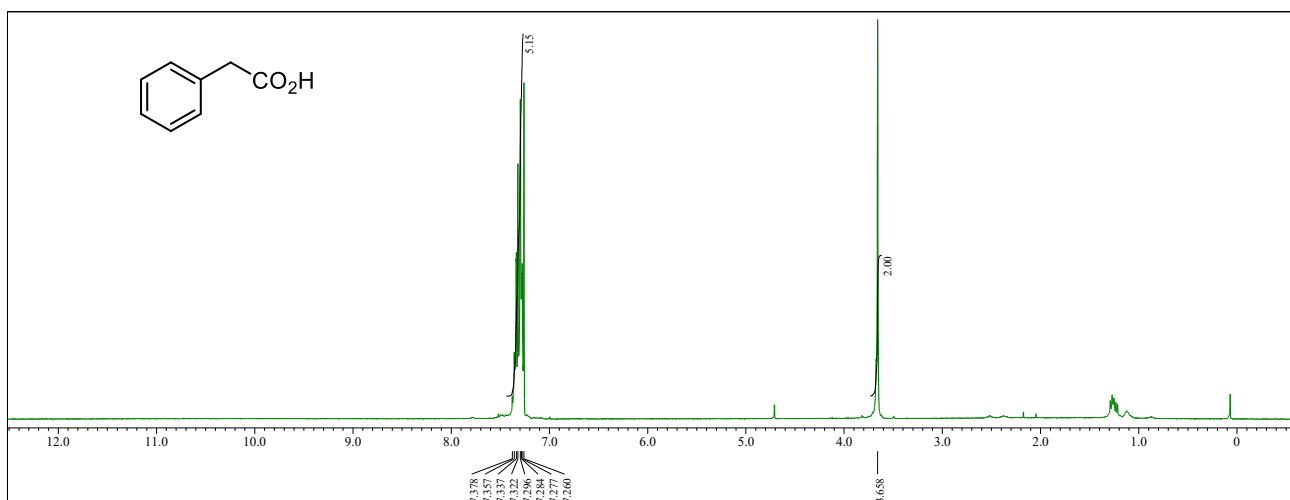

400 MHz  $^1\text{H}$  NMR spectrum of **4e** in  $\text{CDCl}_3$ .

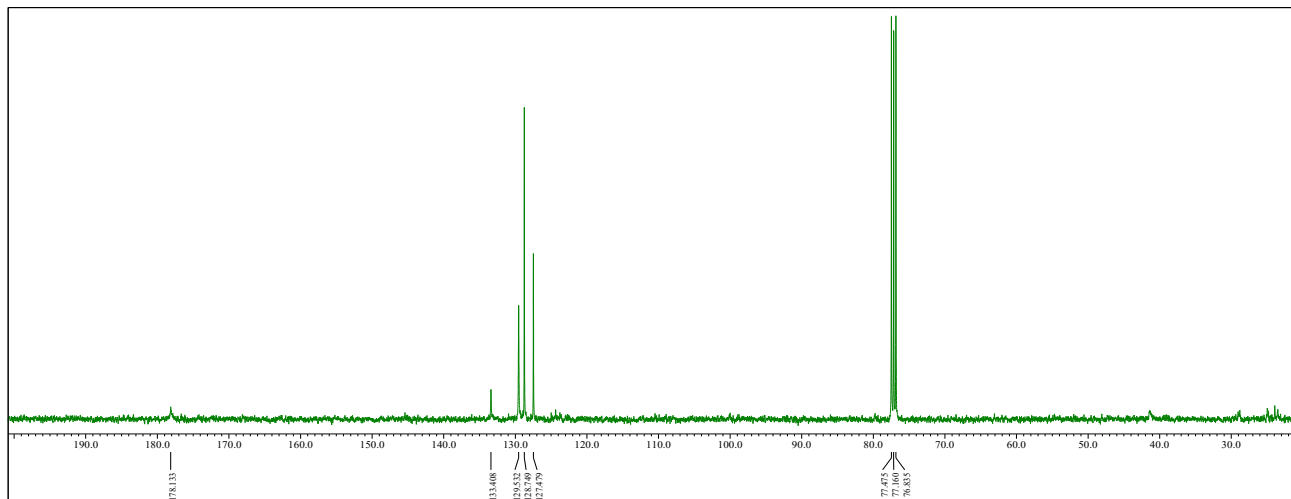

100 MHz  $^{13}\text{C}$  NMR spectrum of **4e** in  $\text{CDCl}_3$ .

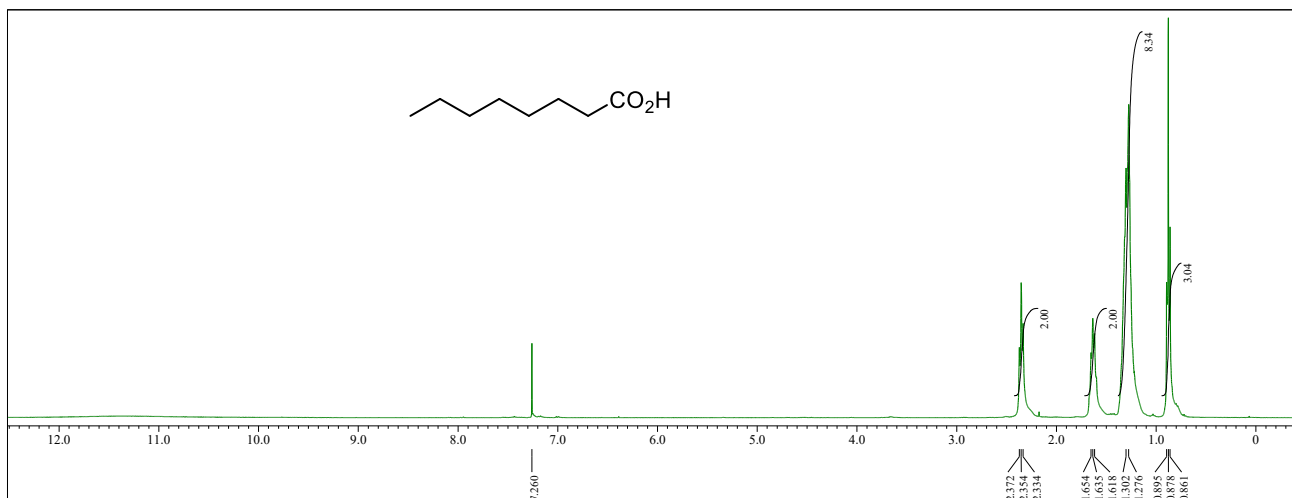

400 MHz  $^1\text{H}$  NMR spectrum of **4f** in  $\text{CDCl}_3$ .

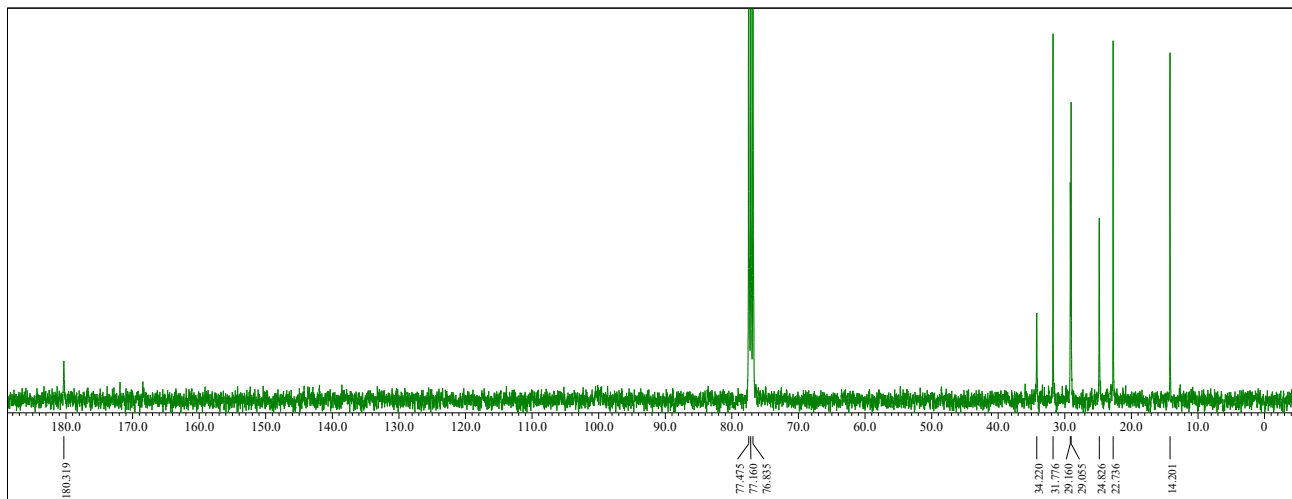

100 MHz  $^{13}\text{C}$  NMR spectrum of **4f** in  $\text{CDCl}_3$ .



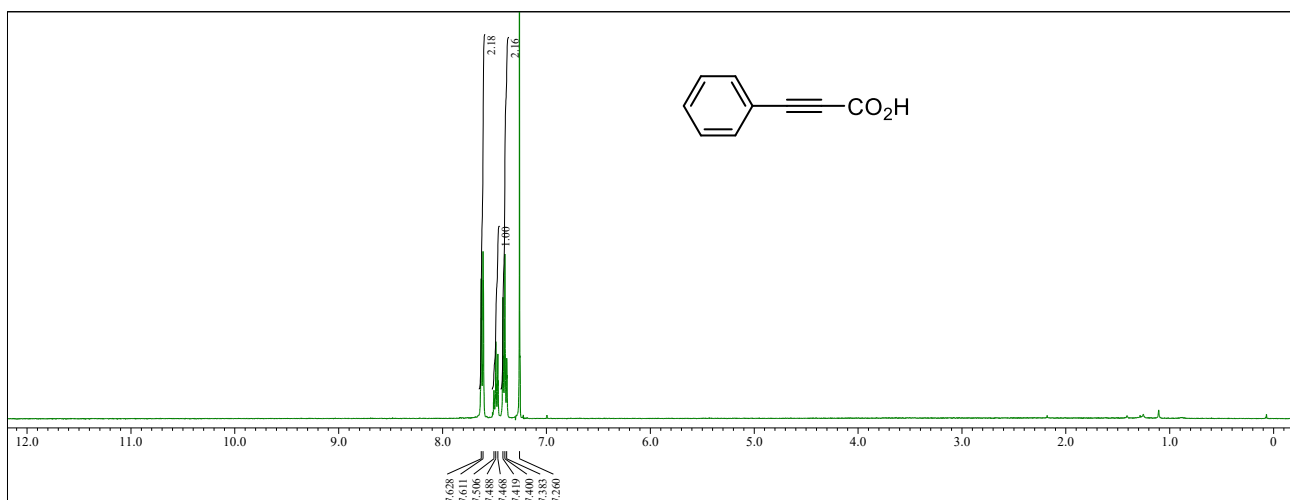

400 MHz  $^1\text{H}$  NMR spectrum of **4g** in  $\text{CDCl}_3$ .

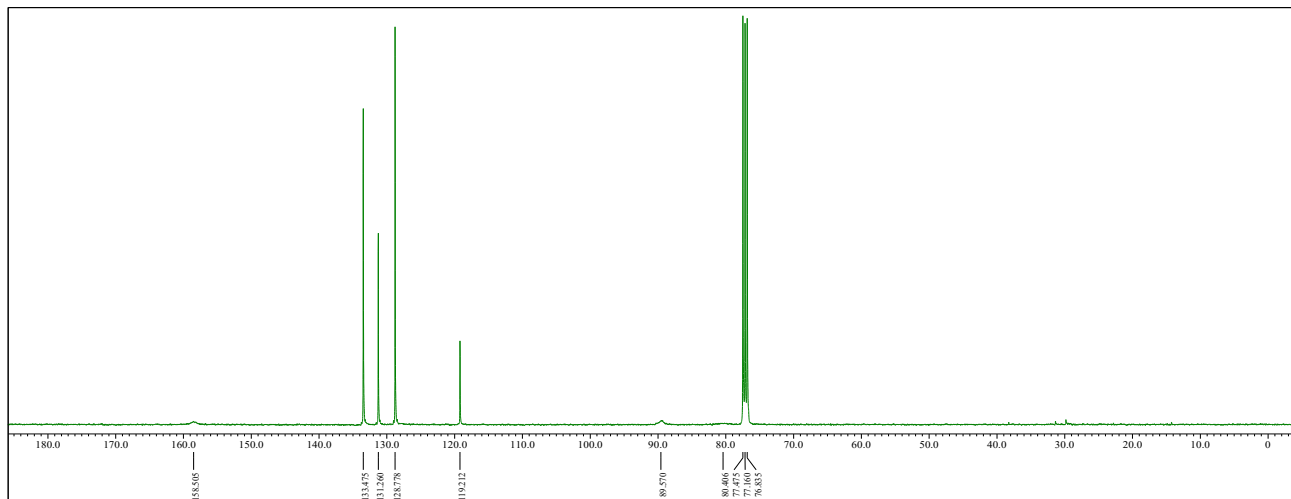

100 MHz  $^{13}\text{C}$  NMR spectrum of **4g** in  $\text{CDCl}_3$ .

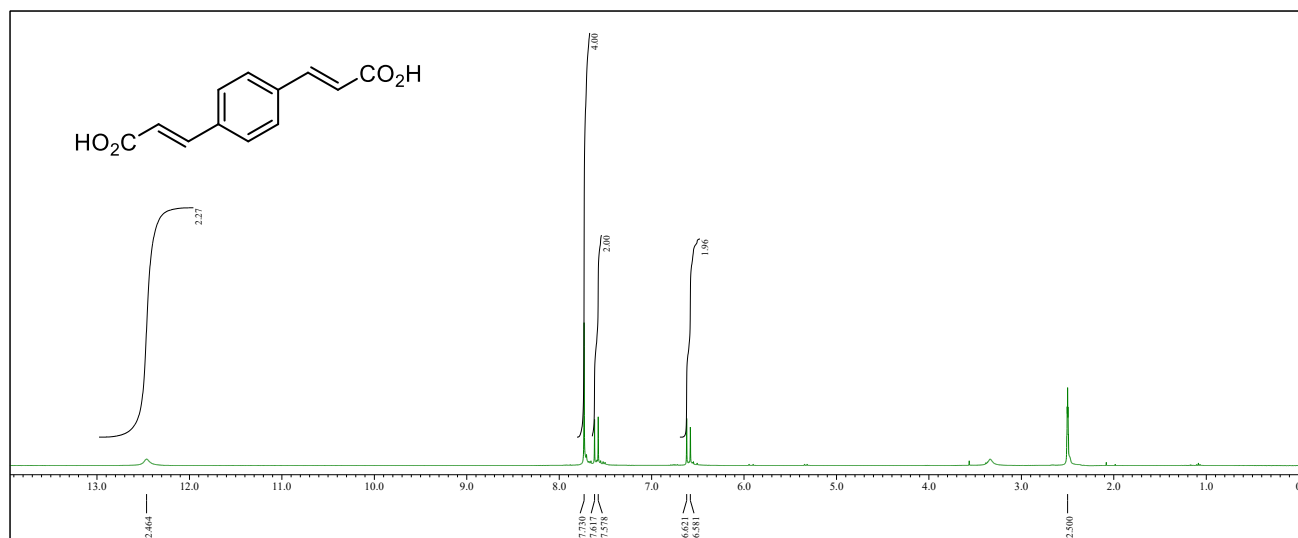

400 MHz  $^1\text{H}$  NMR spectrum of **4h** in  $\text{DMSO-}d_6$ .

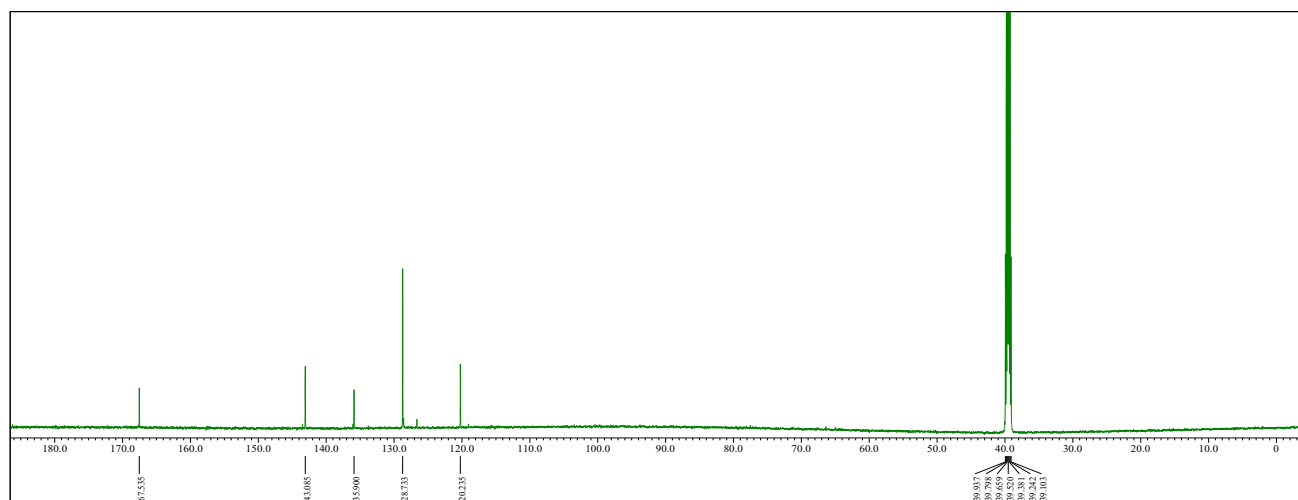

150 MHz  $^{13}\text{C}$  NMR spectrum of **4h** in  $\text{DMSO-}d_6$ .

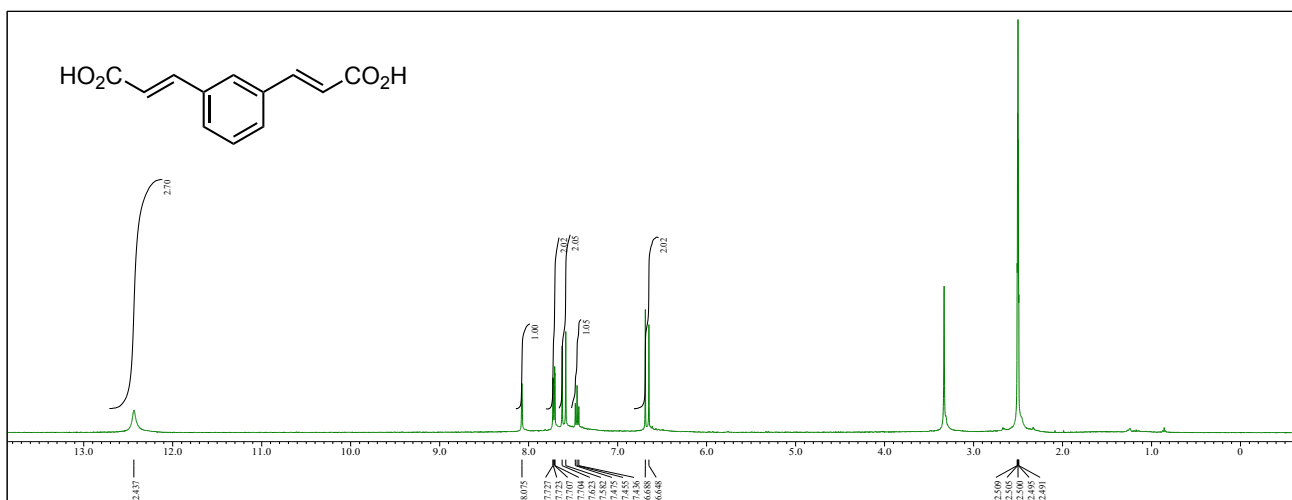

400 MHz  $^1\text{H}$  NMR spectrum of **4i** in  $\text{DMSO}-d_6$ .

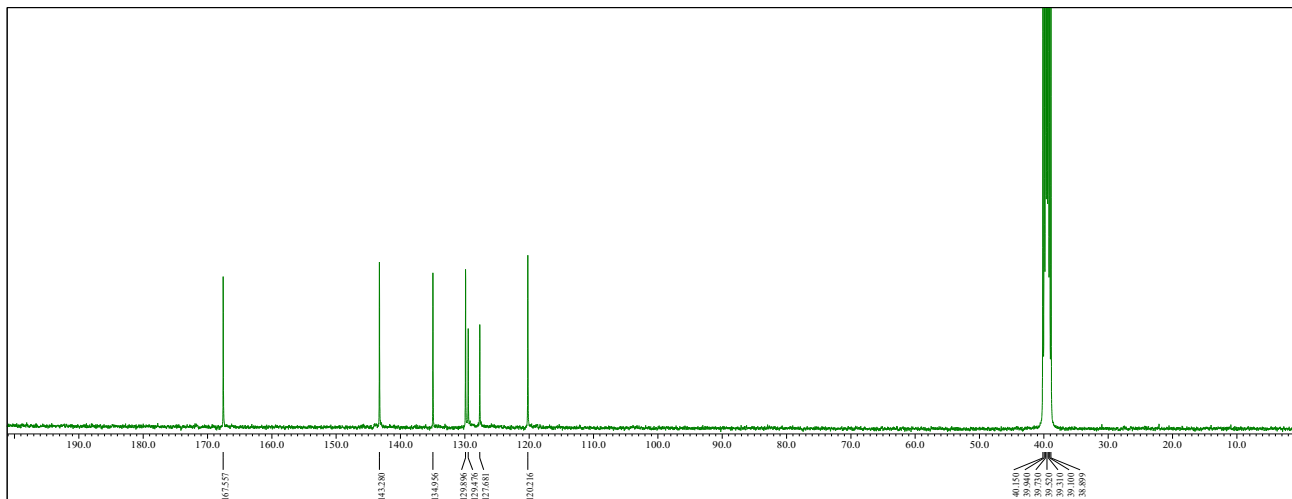

100 MHz  $^{13}\text{C}$  NMR spectrum of **4i** in  $\text{DMSO}-d_6$ .

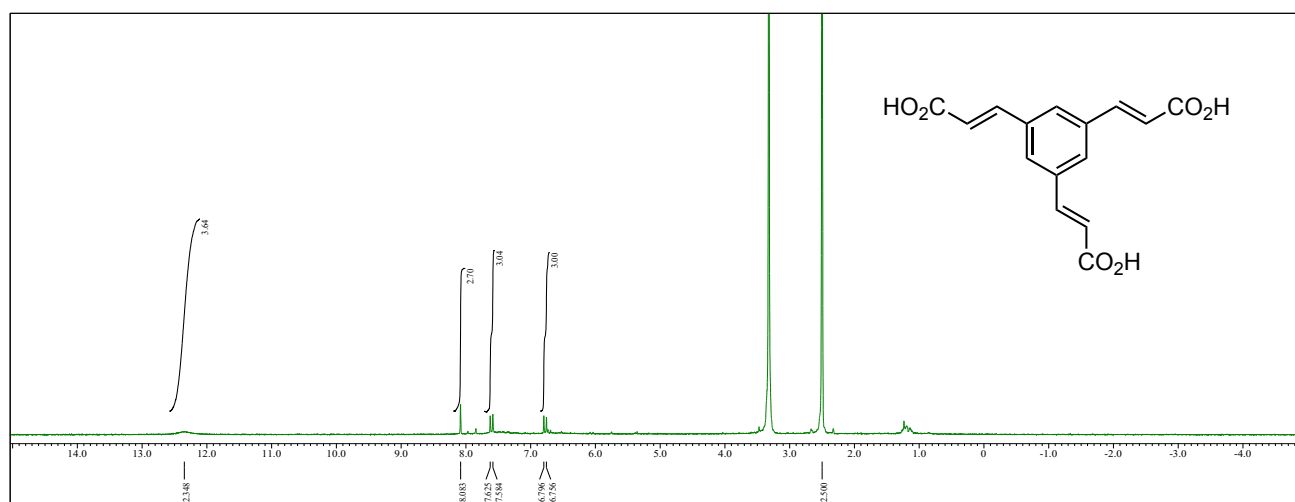

400 MHz  $^1\text{H}$  NMR spectrum of **4j** in  $\text{DMSO-}d_6$ .

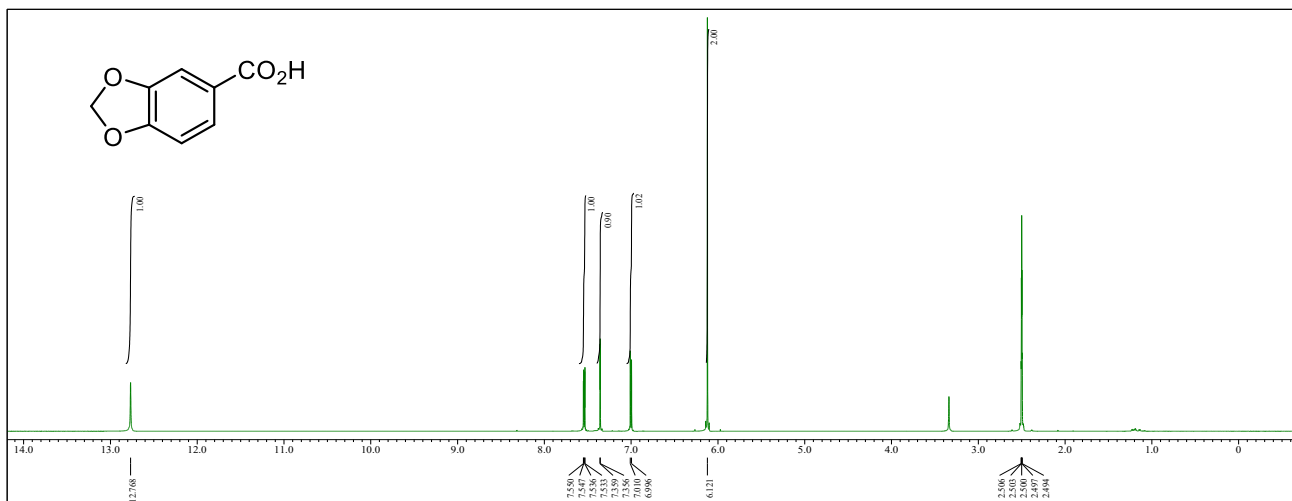

600 MHz  $^1\text{H}$  NMR spectrum of piperonylic acid in  $\text{DMSO-}d_6$ .

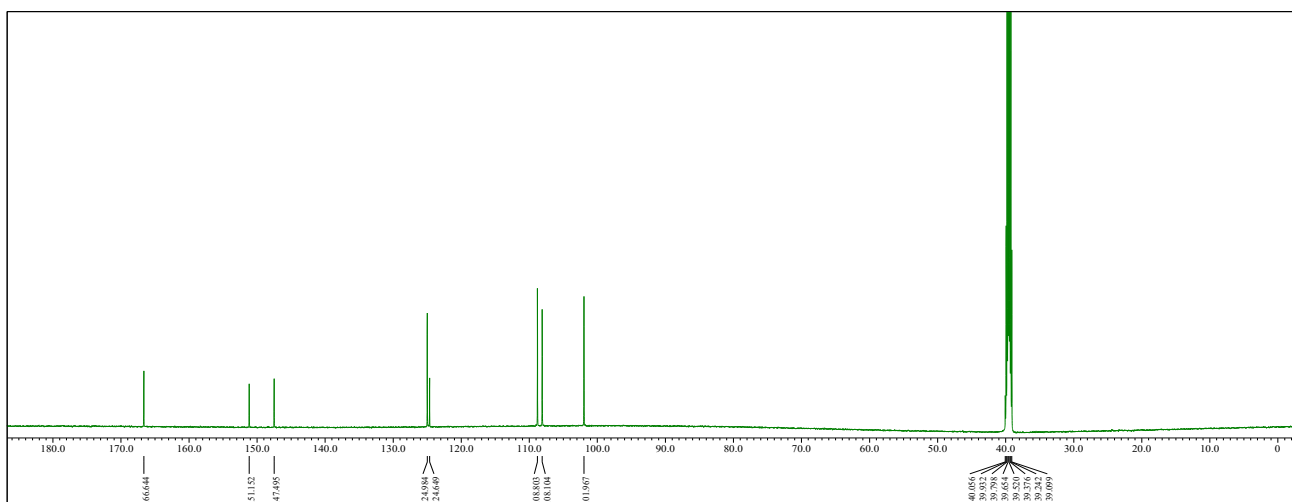

150 MHz  $^{13}\text{C}$  NMR spectrum of piperonylic acid in  $\text{DMSO-}d_6$ .

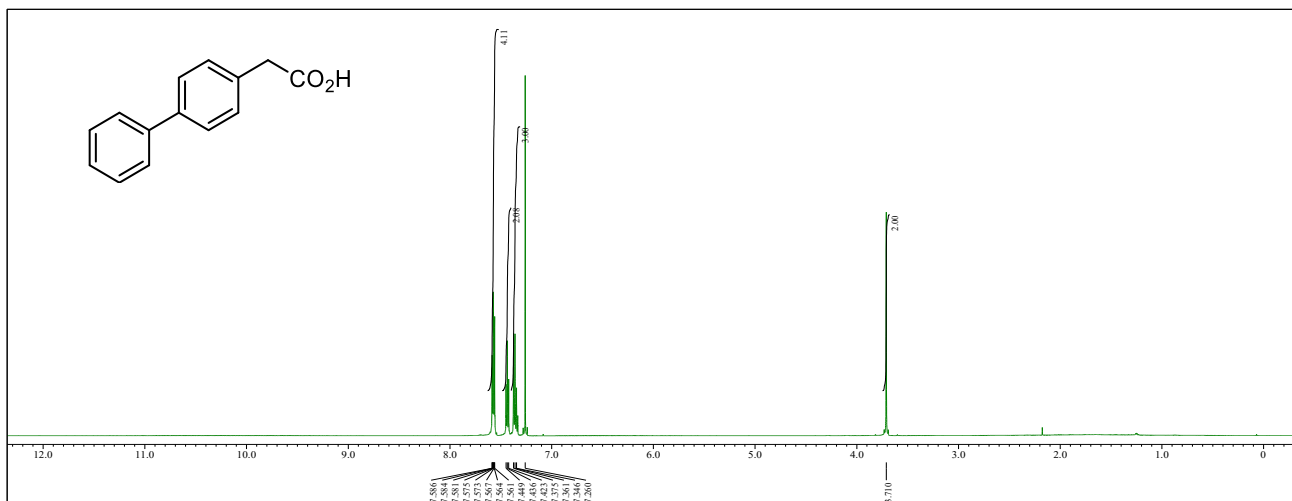

600 MHz  $^1\text{H}$  NMR spectrum of felbinac in  $\text{CDCl}_3$ .

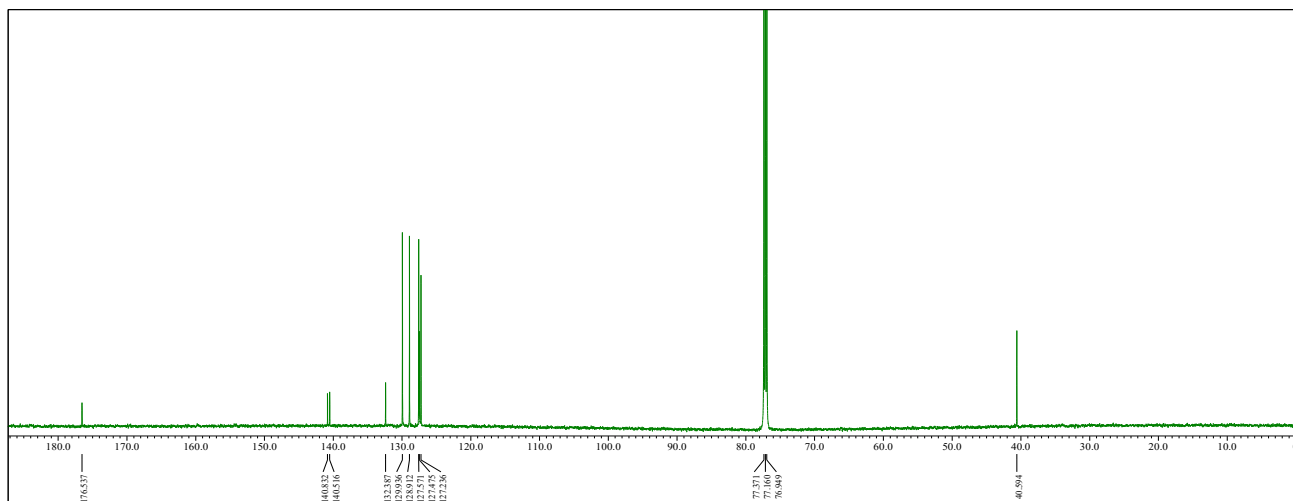

150 MHz  $^{13}\text{C}$  NMR spectrum of felbinac in  $\text{CDCl}_3$ .
